# Supplementary material
Source: PubMed Central journal article supplement (PMC5289895)

**Isotope-Labeling Studies Support an Electrophilic Compound I Iron Active Species (FeO<sup>3+</sup>) for the Carbon-Carbon Bond Cleavage Reaction of the Cholesterol Side Chain Cleavage Enzyme, Cytochrome P450 11A1 (P450<sub>scc</sub>)**

Francis K. Yoshimoto,<sup>1</sup> I-Ji Jung,<sup>2</sup> Sandeep Goyal,<sup>3</sup> Eric Gonzalez, and F. Peter Guengerich\*

*J. Am. Chem. Soc.* 2016, xxx, xxxxx

**Table of Contents**

|                                                                                                                                                                                                                |             |
|----------------------------------------------------------------------------------------------------------------------------------------------------------------------------------------------------------------|-------------|
| <b>1. Codon optimization and construction of expression vector for human P450 11A1</b>                                                                                                                         | <b>S-3</b>  |
| <b>2. Enzyme-catalyzed conversion of isocaproaldehyde to 4-methylpentan-1-ol (reduction rate of 5 to 10)</b>                                                                                                   | <b>S-4</b>  |
| <b>3. Detection of naturally abundant mono-<sup>18</sup>O-isotope incorporated ethylpyridine acetate (18d-1, <i>m/z</i> 168.0905, ~0.003%) from synthetic standard.</b>                                        | <b>S-7</b>  |
| <b>4. LC-MS analysis of picolinoylated 21,21,21-<i>d</i><sub>3</sub>-20,22-dihydroxycholesterol 3a (<i>d</i><sub>3</sub>:<i>d</i><sub>2</sub>:<i>d</i><sub>1</sub>:<i>d</i><sub>0</sub> ratio 27:64:50:11)</b> | <b>S-8</b>  |
| <b>5. LC-MS analysis of picolinoylated-pregnenolone using 17,21,21,21-<i>d</i><sub>4</sub>-20,22-dihydroxycholesterol (3b) as the starting material</b>                                                        | <b>S-8</b>  |
| <b>6. Experimental data for synthesized chemicals</b>                                                                                                                                                          | <b>S-9</b>  |
| <b>6.1. Pregnenolone-3-OTBDMS (6)</b>                                                                                                                                                                          | <b>S-9</b>  |
| <b>6.2. Dithiane (7)</b>                                                                                                                                                                                       | <b>S-10</b> |
| <b>6.3. Hg reaction (8)</b>                                                                                                                                                                                    | <b>S-11</b> |
| <b>6.4. Grignard adduct (9)</b>                                                                                                                                                                                | <b>S-12</b> |
| <b>6.5. TBDMS deprotection (3)</b>                                                                                                                                                                             | <b>S-13</b> |
| <b>6.6. Synthesis of (6a)</b>                                                                                                                                                                                  | <b>S-15</b> |
| <b>6.7. Deuterated dithiane (7a)</b>                                                                                                                                                                           | <b>S-15</b> |
| <b>6.8. Hg reaction to form (8a)</b>                                                                                                                                                                           | <b>S-18</b> |

|                                             |             |
|---------------------------------------------|-------------|
| <b>6.9. Grignard adduct (9a)</b> .....      | <b>S-19</b> |
| <b>6.10. Synthesis of (3a)</b> .....        | <b>S-21</b> |
| <b>6.11. Acetonide (3z) formation</b> ..... | <b>S-24</b> |
| <b>6.12. Synthesis of (5)</b> .....         | <b>S-27</b> |
| <b>6.13. Synthesis of (15)</b> .....        | <b>S-30</b> |
| <b>6.14. 4-Step Synthesis of 3b</b> .....   | <b>S-31</b> |
| <b>6.14.1. Synthesis of (6b)</b> .....      | <b>S-31</b> |
| <b>6.14.2. Synthesis of (7b)</b> .....      | <b>S-32</b> |
| <b>6.14.3. Synthesis of (3b)</b> .....      | <b>S-32</b> |
| <b>6.14.4. Synthesis of (3b)</b> .....      | <b>S-33</b> |

## 1. Codon optimization and construction of expression vector for human P450

**11A1.** The website from Integrated DNA Technologies (Coralville, IA) (<http://www.idtdna.com/CodonOpt>) was used to generate an *Escherichia coli* codon optimization sequence for human P450 11A1 (*CYP11A1*).

A cDNA the sequence for human P450 11A1 (*CYP11A1*) and a C-terminal (His)<sub>6</sub> tag was synthesized and ligated into a pCW expression vector (using *NdeI* and *HindIII* restriction sites) by Genewiz (South Plainfield, NJ, USA).

The sequence used for synthesis of *CYP11A1* cDNA:

```
ATGGCAAGCACGCGCAGCCCGCGTCCGTTTAAACGAAATTCCGTCTCCAGGCGACAACGGA
M A S T R S P R P F N E I P S P G D N G
TGGCTGAATCTCTATCACTTTTGGCGTGAAACGGGCACTCATAAAGTTCACCTGCATCAC
W L N L Y H F W R E T G T H K V H L H H
GTCCAGAACTTCCAGAAGTACGGCCCTATCTACCGCGAAAAGCTGGGGAATGTTGAAAGT
V Q N F Q K Y G P I Y R E K L G N V E S
GTCTATGTCATCGATCCTGAAGATGTCGCATTGCTGTTTAAAAGTGAGGGCCCGAATCCC
V Y V I D P E D V A L L F K S E G P N P
GAACGTTTCTGATCCC GCCGTGGGTGGCTTACCACCAATATTATCAGCGTCCAATTGGC
E R F L I P P W V A Y H Q Y Y Q R P I G
GTGCTGCTGAAGAAAAGCGCAGCTTGGAAAAAGATCGCGTTGCCCTGAACCAAGAAGTC
V L L K K S A A W K K D R V A L N Q E V
ATGGCCCCAGAAGCAACCAAGAATTTCTGCCTCTGCTGGATGCCGTGTCCCGCGACTTT
M A P E A T K N F L P L L D A V S R D F
GTCTCTGTTCTGCATCGTCGATTAAGAAGGCCGGGAGCGGCAACTACAGCGGTGACATC
V S V L H R R I K K A G S G N Y S G D I
AGCGATGATCTTTTCCGTTTCCGCTTTCGAATCAATTACCAACGTTATTTTTGGTGAACGT
S D D L F R F A F E S I T N V I F G E R
CAGGGCATGCTGGAGGAAGTAGTCAACCCGGAAGCGCAACGCTTCATTGATGCAATTTAC
Q G M L E E V V N P E A Q R F I D A I Y
CAGATGTTTACACGAGCGTCCCGATGCTGAACTTACCGCCTGATCTCTTTCGCTTGTTT
Q M F H T S V P M L N L P P D L F R L F
CGTACCAAAACCTGGAAAGATCACGTTGCGGCATGGGACGTAATTTTTCAGCAAAGCCGAC
R T K T W K D H V A A W D V I F S K A D
ATCTACACTCAGAATTTCTATTGGGAGCTGCGCCAGAAAGGTAGCGTACATCAGACTAT
I Y T Q N F Y W E L R Q K G S V H H D Y
CGTGGTATTCTGTATCGCCTCCTCGGTGATAGCAAGATGAGTTTTGAGGACATTAAGCT
R G I L Y R L L G D S K M S F E D I K A
AATGTTACCGAGATGCTGGCGGGCGGTGTGGACACGACGAGCATGACTCTGCAGTGGCAT
N V T E M L A G G V D T T S M T L Q W H
TTGTACGAGATGGCGCGTAATCTGAAAGTCCAGGATATGTTACGTGCCGAAGTCCTGGCC
L Y E M A R N L K V Q D M L R A E V L A
GCCCCGTACCAAGCGCAGGGTGACATGGCAACCATGCTGCAACTGGTGCCCCTGCTGAAA
A R H Q A Q G D M A T M L Q L V P L L K
GCTAGCATCAAGGAAACGTTACGTCTGCATCCGATTAGCGTCACCTTACAGCGCTATCTG
```

A S I K E T L R L H P I S V T L Q R Y L  
 GTGAACGATCTCGTGCTCCGCGACTATATGATTCCGGCGAAAACGCTGGTTCAGGTCGCG  
 V N D L V L R D Y M I P A K T L V Q V A  
 ATTTACGCGCTGGGGCGTGAACCGACCTTCTTTTTTCGATCCCGAAAACCTTTGACCCGACT  
 I Y A L G R E P T F F F D P E N F D P T  
 CGCTGGTTGAGTAAAGATAAAAAATATCACGTATTTTCGTAATCTTGGCTTCGGCTGGGGT  
 R W L S K D K N I T Y F R N L G F G W G  
 GTGCGCAATGCTTAGGTCGCCGTATCGCCGAACCTGGAAATGACCATTTTCCTGATTAAT  
 V R Q C L G R R I A E L E M T I F L I N  
 ATGCTGGAAAATTTCCGTGTTGAAATTCAGCATCTGTCTGATGTGGGTACCACCTTTAAT  
 M L E N F R V E I Q H L S D V G T T F N  
 CTCATTCTGATGCCGAAAAACCTATCAGCTTACCTTTTGGCCGTTCAACCAAGAAGCG  
 L I L M P E K P I S F T F W P F N Q E A  
 ACGCAACAACACCATCACCATCACCATTAA  
 T Q Q H H H H H H STOP

## 2. Enzyme-Catalyzed Conversion of Isocaproaldehyde to 4-Methylpentan-1-ol.

The rate of the enzyme-catalyzed reduction of the isocaproaldehyde (4-methylpentanal) to 4-methylpentan-1-ol (NADH-dependent) was measured by using an OLIS 14 UV/Vis/NIR spectrophotometer (On-Line Instrument Systems, Bogart, GA) with a visible lamp (beam splitter on). The machine was run using OLIS Spectral Works software (Version 4.7.76) and set to 200 increments and 2 reads per datum. The reactions were run in a glass cuvette (1 cm path length) at room temperature. Two enzymes were tested: yeast and horse liver alcohol dehydrogenase (Sigma-Aldrich). Reactions were performed at room temperature.

A master mix was made containing potassium phosphate buffer (100 mM, pH 7.4) and NADH (150  $\mu$ M), which would be used for each concentration point (970  $\mu$ L of master mix was used for each concentration point). Isocaproaldehyde stock solutions were made in CH<sub>3</sub>CN/H<sub>2</sub>O, 1:1, v/v (100 mM, 500 mM, 1 mM, 10 mM, 50 mM, 100 mM, 150 mM, 175 mM, and 200 mM). For each concentration point, 20  $\mu$ L of substrate was added. The reactions were initiated by the addition of 10  $\mu$ L of enzyme solution (1 mg/mL) using a plumping device (cuvette mixer, to mix the solution). After the enzyme was added, the decrease in absorbance at 340 nm (i.e. the absorbance maximum of NADH) was monitored for 60-120 seconds. The molar extinction coefficient of NADH at 340 nm is 6,220 M<sup>-1</sup>cm<sup>-1</sup>, and the reduction rate was calculated accordingly.

Data were plotted using Prism software (Graphpad, La Jolla, CA, version 5.0d) fitting the points using the non-linear regression curve fitting option for the Michaelis-Menten equation. The  $k_{cat}$  and  $K_M$  values for yeast alcohol dehydrogenase were 4.5 s<sup>-1</sup> and 32  $\mu$ M. The  $k_{cat}$  and  $K_M$  values for horse liver alcohol dehydrogenase were 0.06 s<sup>-1</sup> and 772  $\mu$ M.

**Michaelis-Menten data:  
Yeast ADH/4-methyl-pentanal**

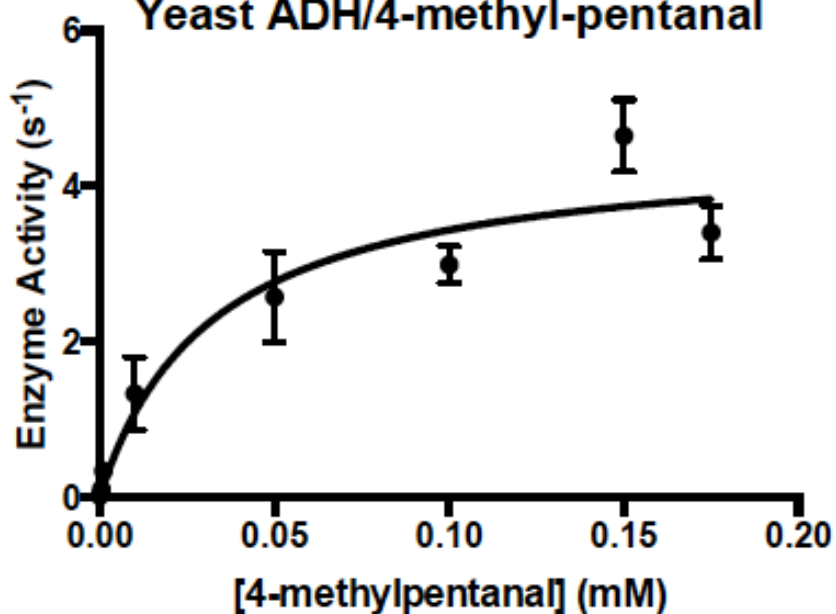

|                          | Enzyme Activity     |
|--------------------------|---------------------|
| Michaelis-Menten         |                     |
| Best-fit values          |                     |
| Vmax                     | 4.535               |
| Km                       | 0.03201             |
| Std. Error               |                     |
| Vmax                     | 0.5243              |
| Km                       | 0.01421             |
| 95% Confidence Intervals |                     |
| Vmax                     | 3.411 to 5.660      |
| Km                       | 0.001521 to 0.06249 |
| Goodness of Fit          |                     |
| Degrees of Freedom       | 14                  |
| R square                 | 0.9147              |
| Absolute Sum of Squares  | 3.674               |
| Sy.x                     | 0.5123              |
| Constraints              |                     |
| Km                       | Km > 0.0            |
|                          |                     |
| Number of points         |                     |
| Analyzed                 | 16                  |

### Horse liver alcohol dehydrogenase

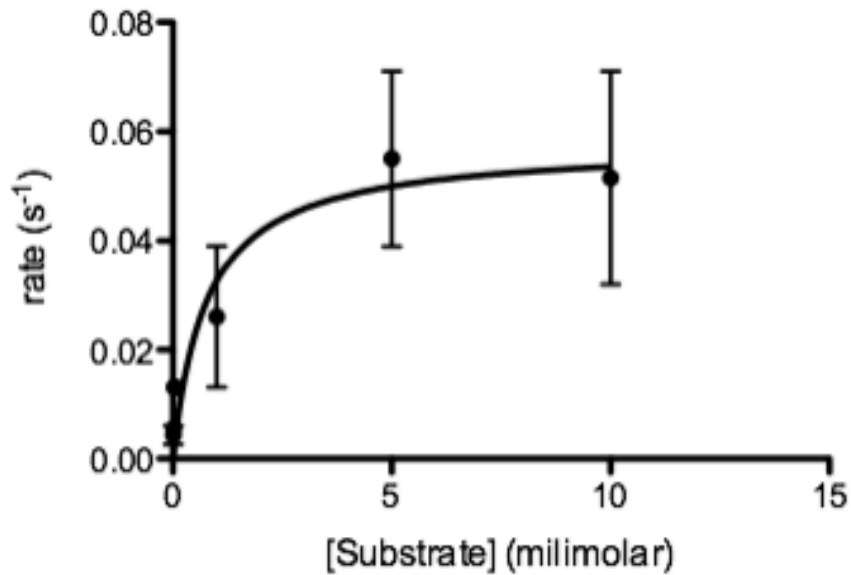

|                          | Enzyme Activity    |
|--------------------------|--------------------|
| Michaelis-Menten         |                    |
| Best-fit values          |                    |
| Vmax                     | 0.05767            |
| Km                       | 0.7715             |
| Std. Error               |                    |
| Vmax                     | 0.01059            |
| Km                       | 0.6787             |
| 95% Confidence Intervals |                    |
| Vmax                     | 0.03458 to 0.08075 |
| Km                       | 0.0 to 2.250       |
| Goodness of Fit          |                    |
| Degrees of Freedom       | 12                 |
| R square                 | 0.6848             |
| Absolute Sum of Squares  | 0.002208           |
| Sy.x                     | 0.01356            |
| Constraints              |                    |
| Km                       | Km > 0.0           |
| Number of points         |                    |
| Analyzed                 | 14                 |

**3. Detection of naturally abundant mono-<sup>18</sup>O-isotope incorporated ethylpyridine acetate (18d-1, *m/z* 168.0905, ~0.003%) from synthetic standard.**

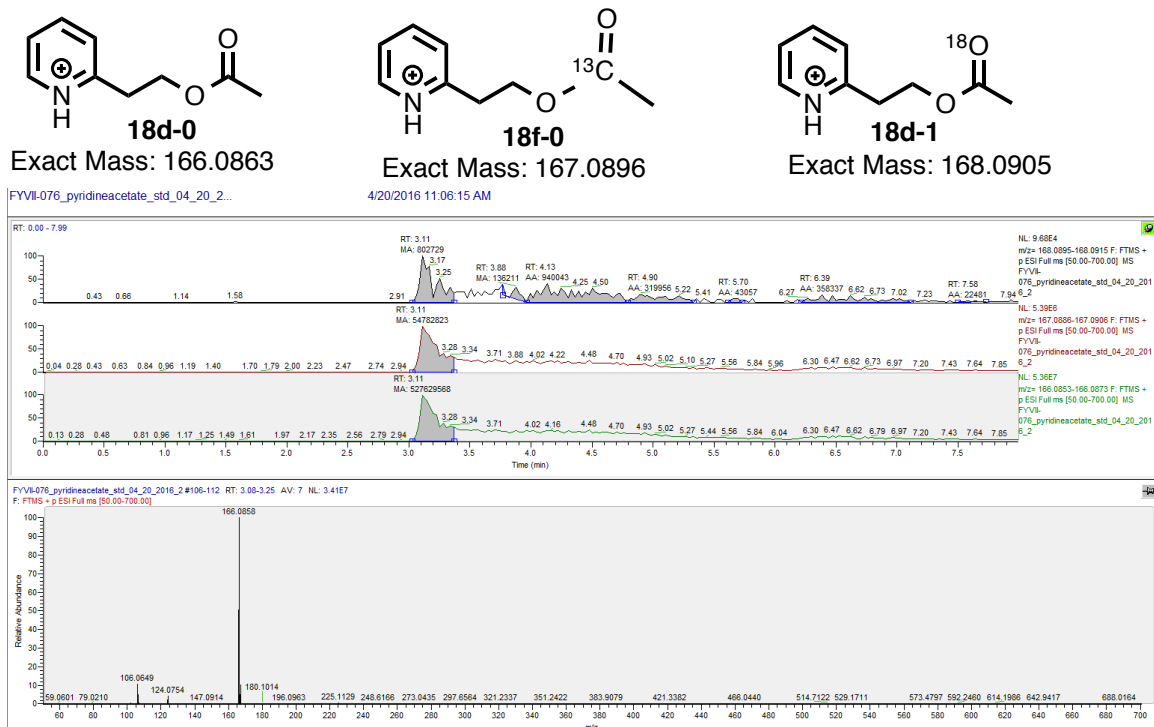

**4. LC-MS analysis of picolinoylated 21,21,21-*d*<sub>3</sub>-20,22-dihydroxycholesterol 3a (*d*<sub>3</sub>:*d*<sub>2</sub>:*d*<sub>1</sub>:*d*<sub>0</sub> ratio 27:64:50:11).**

The synthesis of mono-picolinoylated 21,21,21-*d*<sub>3</sub>-20,22-dihydroxycholesterol (picolinoylated **3a**) is presented in the main text. The following *m/z* values were scanned (the location of the picolinoyl group was not verified to be the 3-position): *m/z* 527.3923, 526.3860, 525.3797, 524.3734, corresponding to *d*<sub>3</sub>-, *d*<sub>2</sub>-, *d*<sub>1</sub>-, and *d*<sub>0</sub>-mono-picolinoylated 20,22-dihydroxycholesterol. The peak of interest is at *t*<sub>R</sub> 5.06 min.

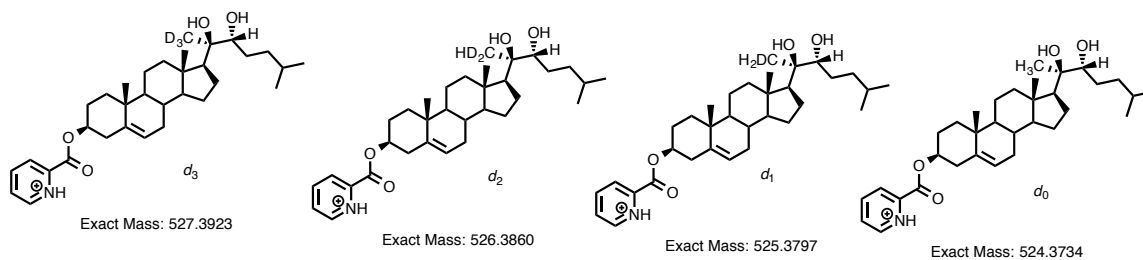

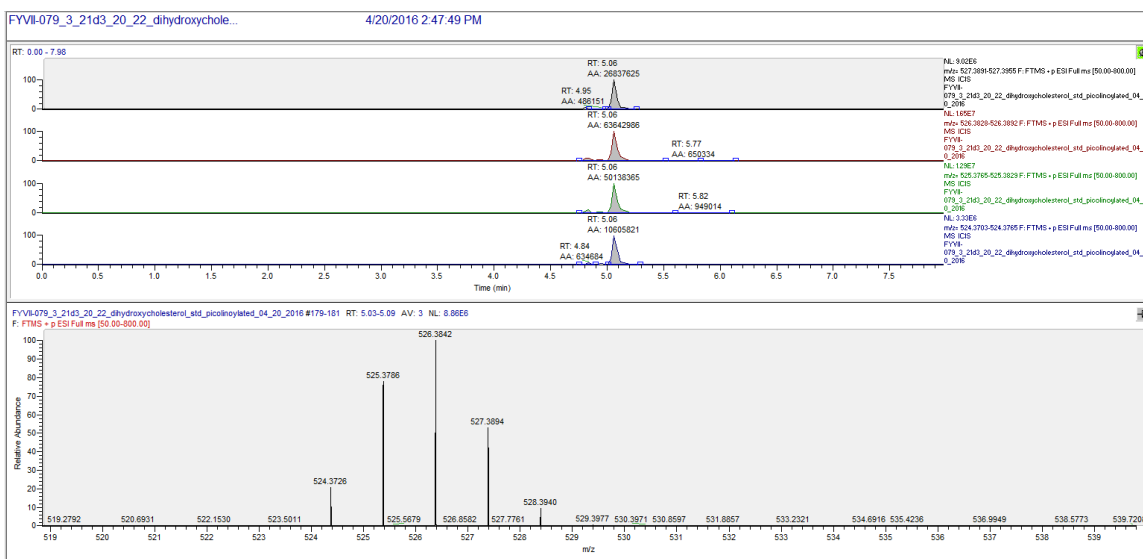

## 5. LC-MS analysis of picolinoylated-pregnenolone product using 17,21,21,21- $d_4$ -20,22-dihydroxycholesterol (**3b**) as the starting material.

The tune conditions for detecting picolinoylated 4-methyl-pentan-1-ol were used to detect picolinoylated pregnenolone (APCI positive mode). The incubation conditions are described in the manuscript, except that a Thunberg tube, gas train, and  $^{18}O_2$  were not used. The incubation was performed in a 16 × 150 mm glass test tube open to air, and the same workup procedure (including derivatization with picolinoyl chloride) described in the main text for the P450 11A1-yeast alcohol dehydrogenase assay was followed. Picolinoylated-tetradepregnenolone (**4z**, calculated:  $m/z$  426.2941, found:  $m/z$  426.2931,  $\Delta = 2.3$  ppm) was detected by LC-MS.

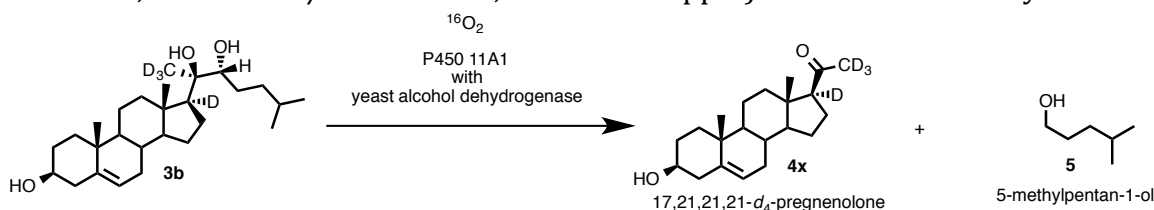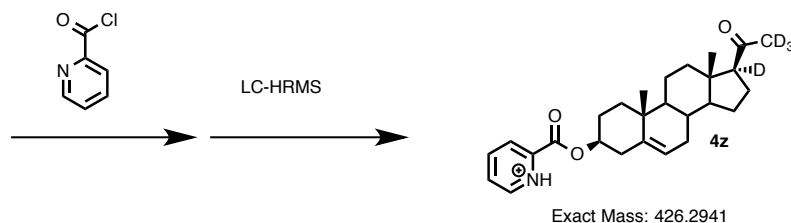



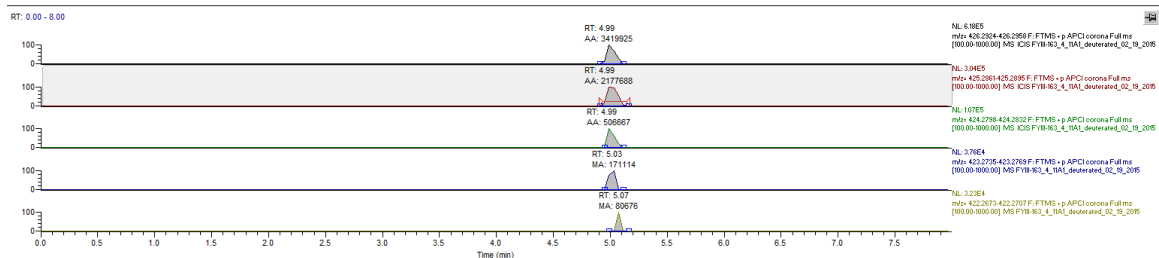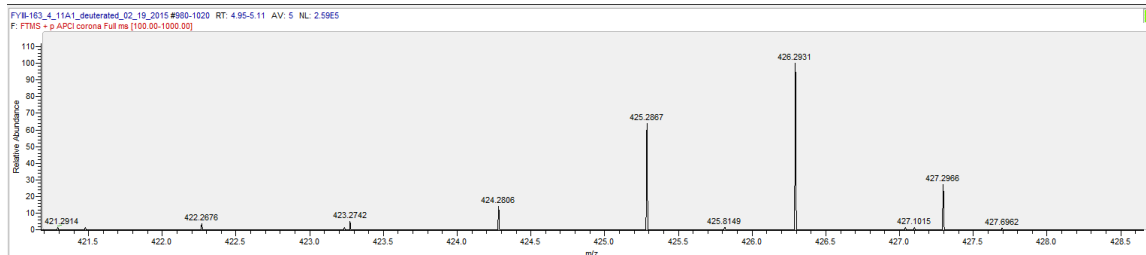

## 6. Experimental data of synthesized chemicals

### 6.1. Pregnenolone-3-OTBDMS (6).

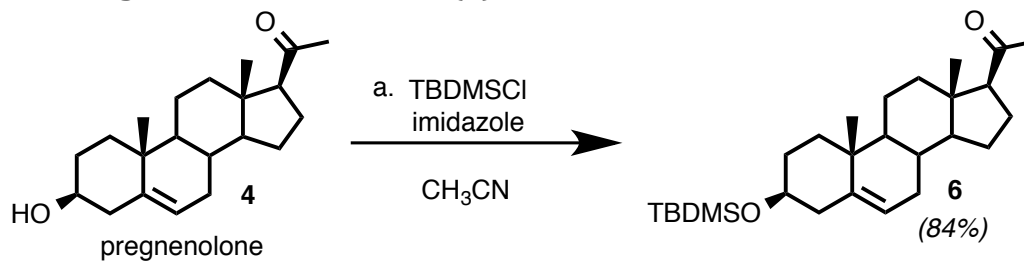

Experimental procedure for the synthesis of TBDMS ether **6**; <sup>1</sup>H NMR chemical shifts are reported in the main text of the manuscript. Below is the <sup>1</sup>H NMR spectrum (**6**, CDCl<sub>3</sub>, 600 MHz).

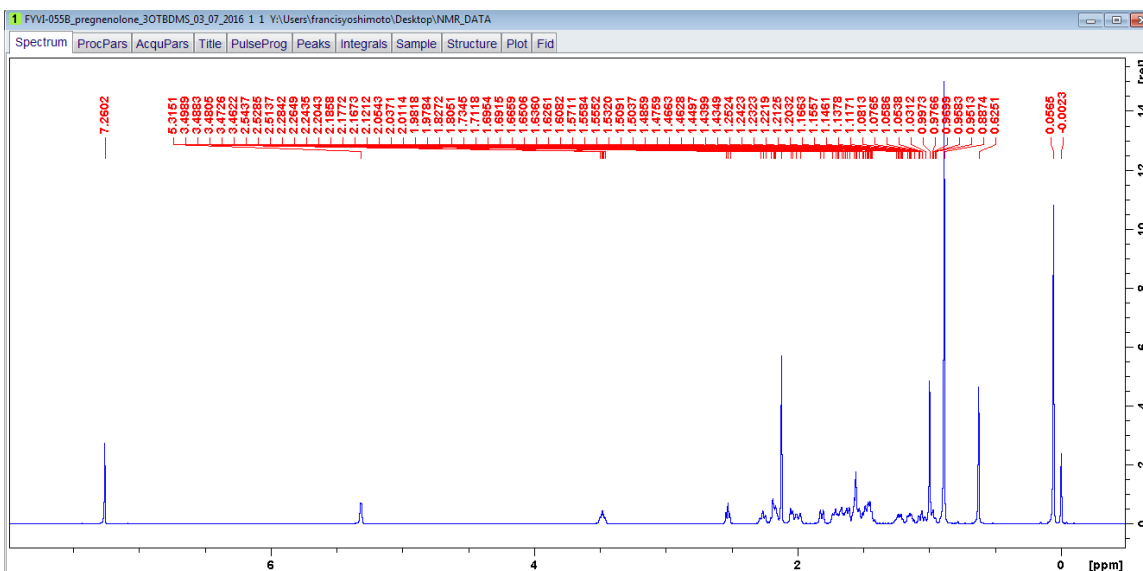

## 6.2. Dithiane (compound 7).

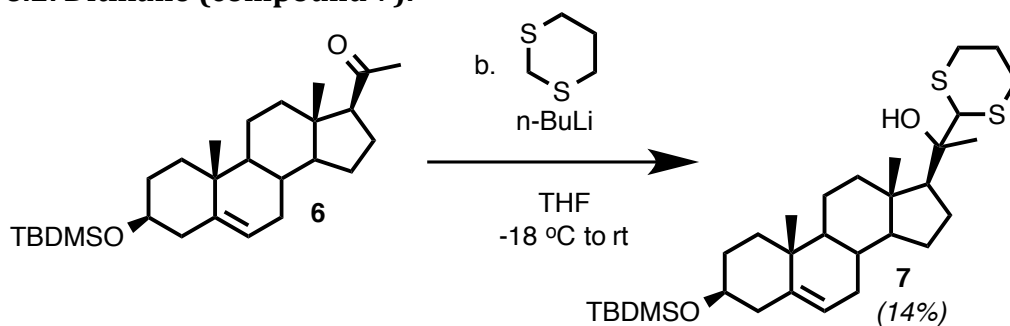

Dithiane **7** was obtained following the procedure in the manuscript. Below are the <sup>1</sup>H and <sup>13</sup>C NMR spectra (**7**, CDCl<sub>3</sub>, 600 MHz and 150 MHz).

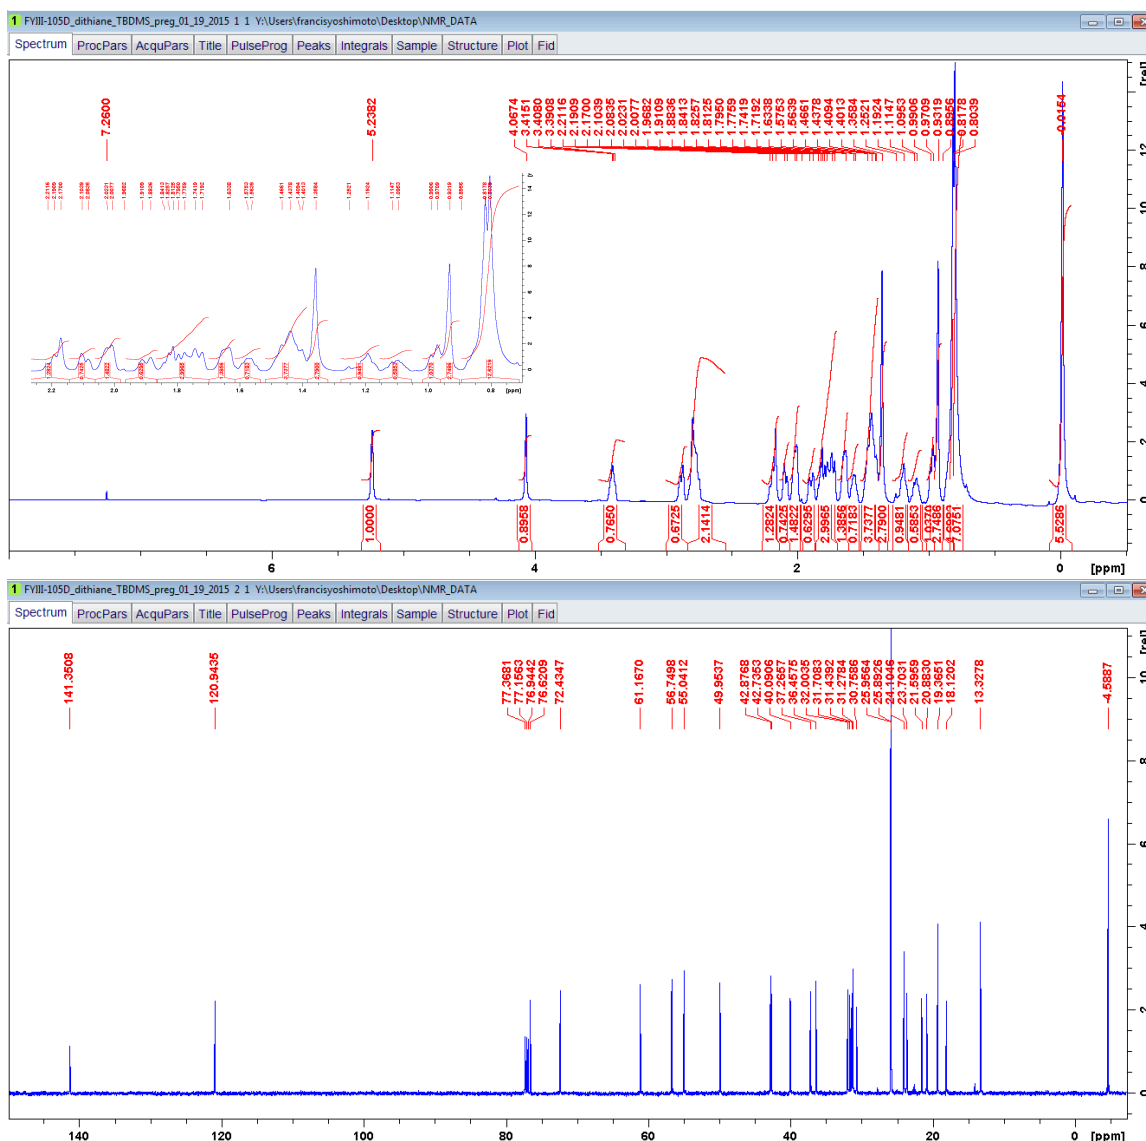

### 6.3. Hg reaction (8).

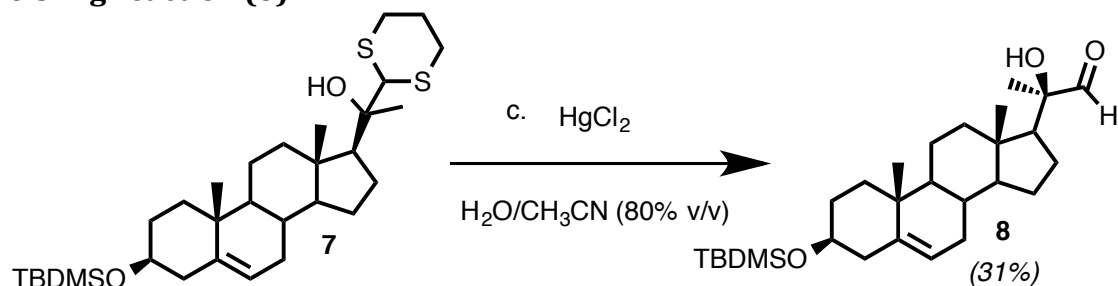

Aldehyde **8** was obtained following the procedure described in the manuscript. Below is the <sup>1</sup>H NMR spectrum (**8**, CDCl<sub>3</sub>, 600 MHz).

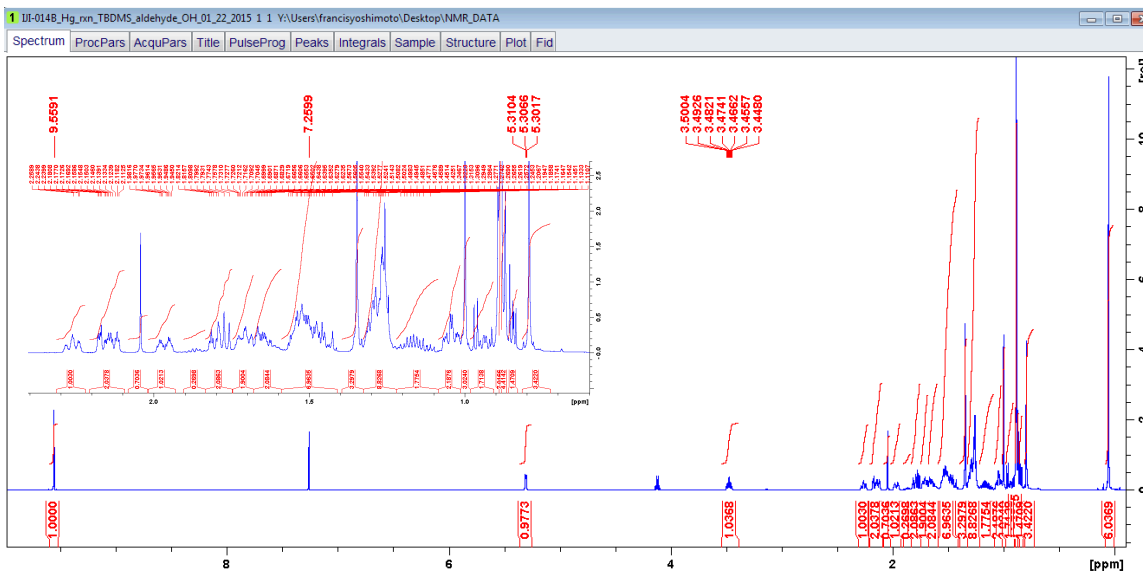

#### 6.4. Grignard adduct (9).

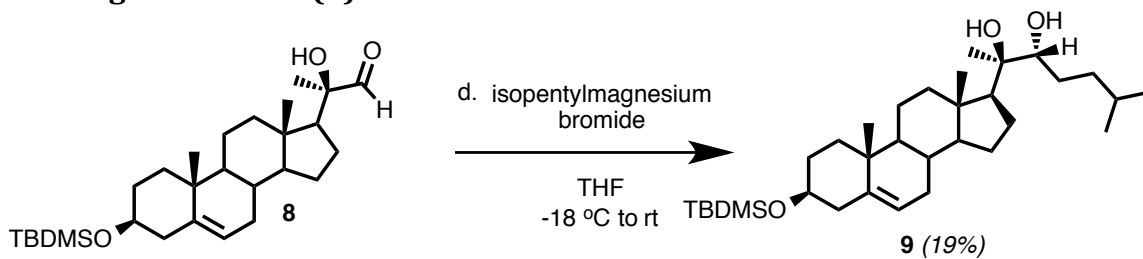

Diol **9** was obtained following the procedure in the manuscript. Below is the  $^1\text{H}$  NMR spectrum (**9**,  $\text{CDCl}_3$ , 600 MHz).

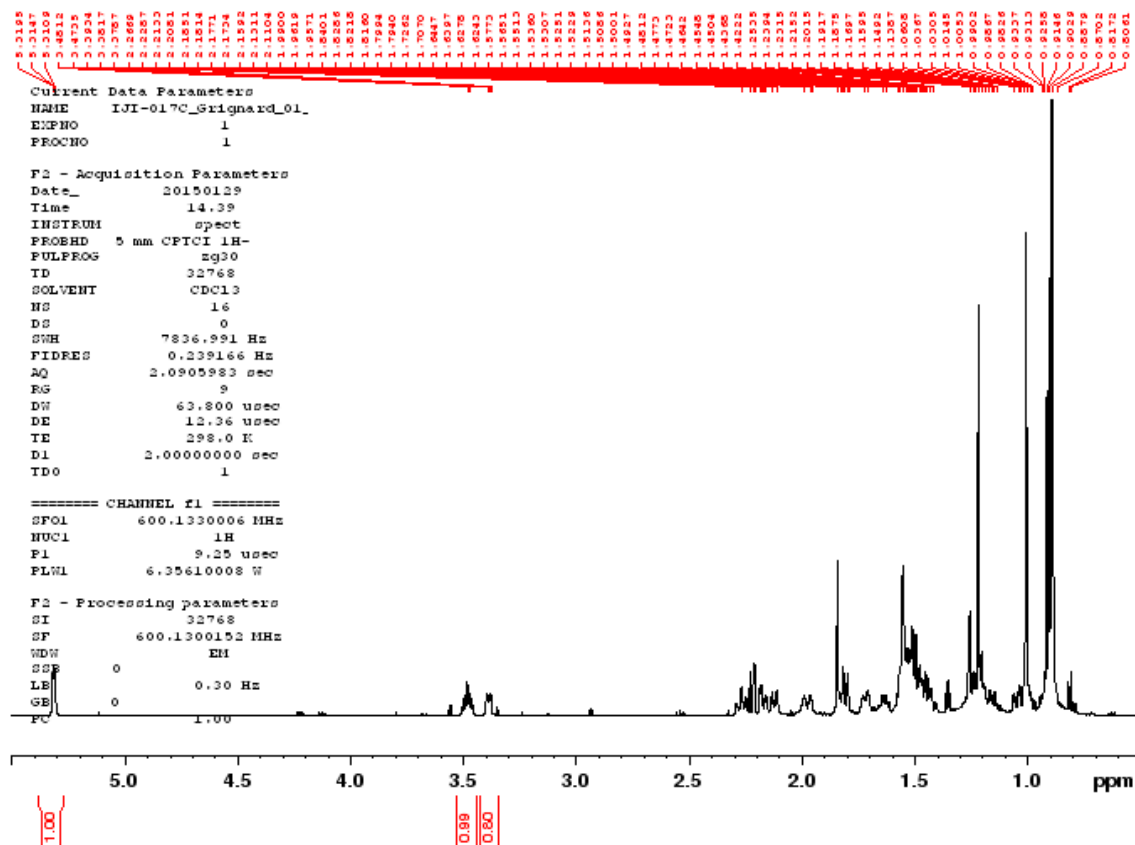

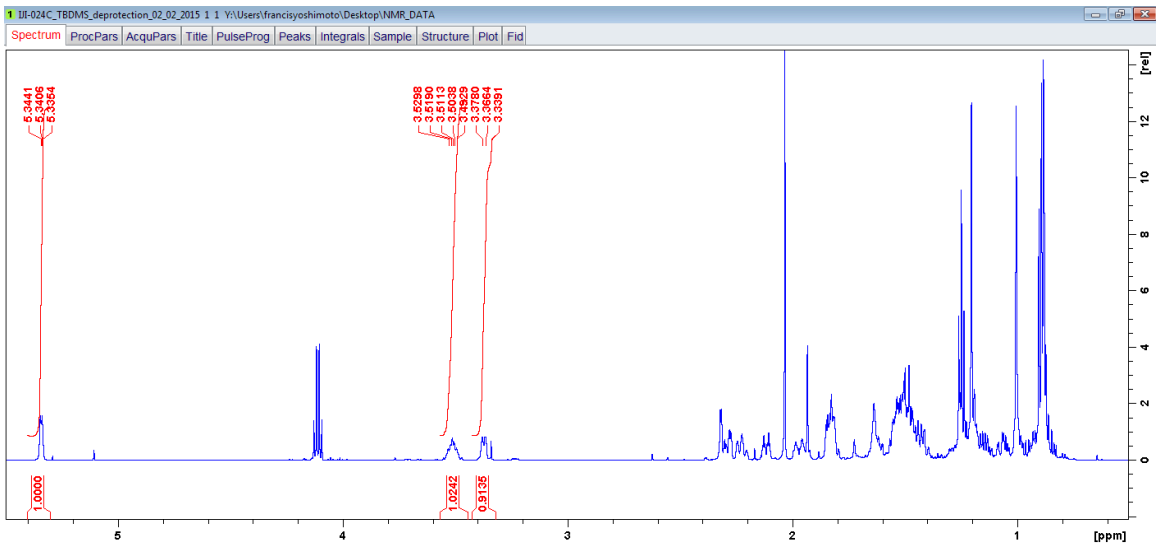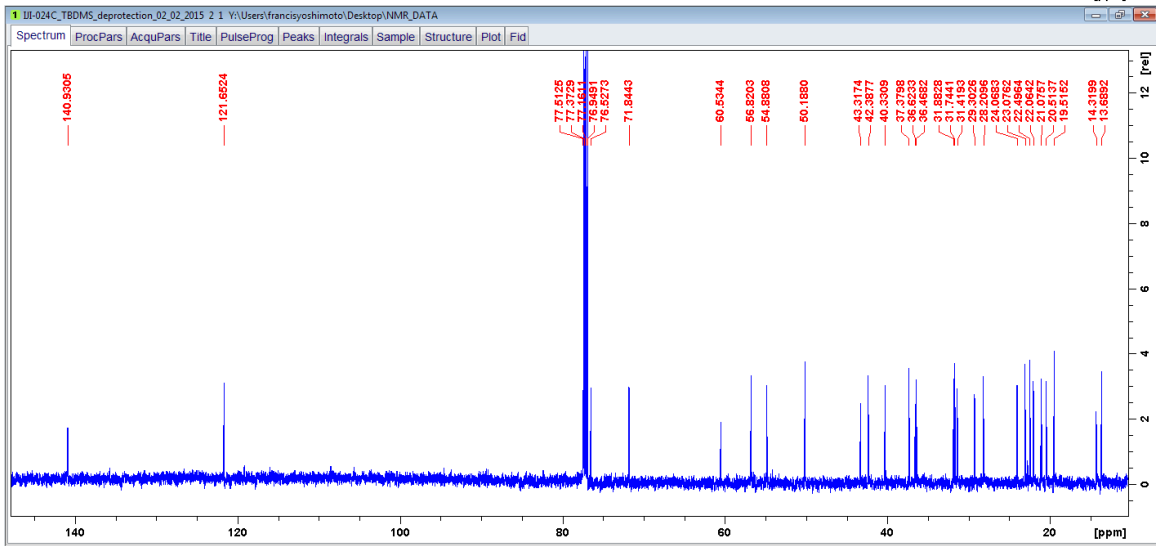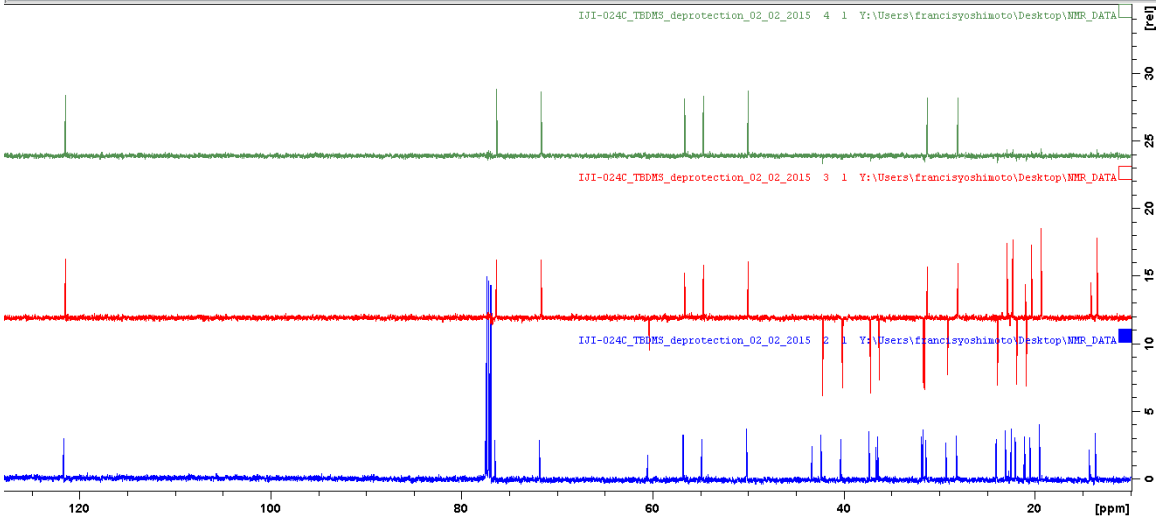

## 6.6. Synthesis of 21,21,21-*d*<sub>3</sub>-Pregnenolone-3-OTBDMS (6a).

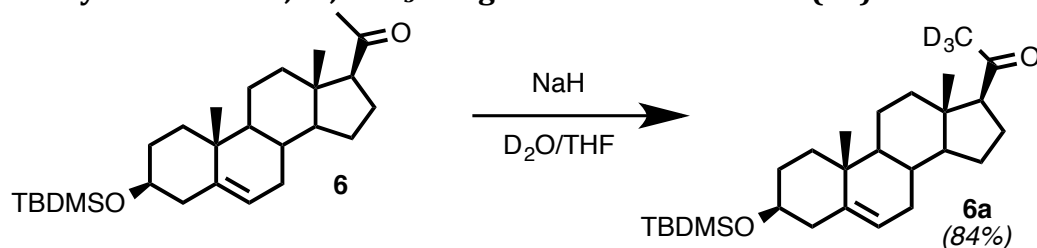

[21,21,21-*d*<sub>3</sub>]-Pregnenolone-3-OTBDMS (**6a**) was obtained following the procedure in the manuscript. Below is the <sup>1</sup>H NMR spectrum (**6a**, CDCl<sub>3</sub>, 600 MHz). The C21-methyl protons ( $\delta$  2.12 ppm) integrates to 0.31 while the C17-proton ( $\delta$  2.52 ppm) integrates to 0.96, confirming regioselective deuteration at C21. Below is the <sup>1</sup>H NMR spectrum (**6a**, CDCl<sub>3</sub>, 600 MHz).

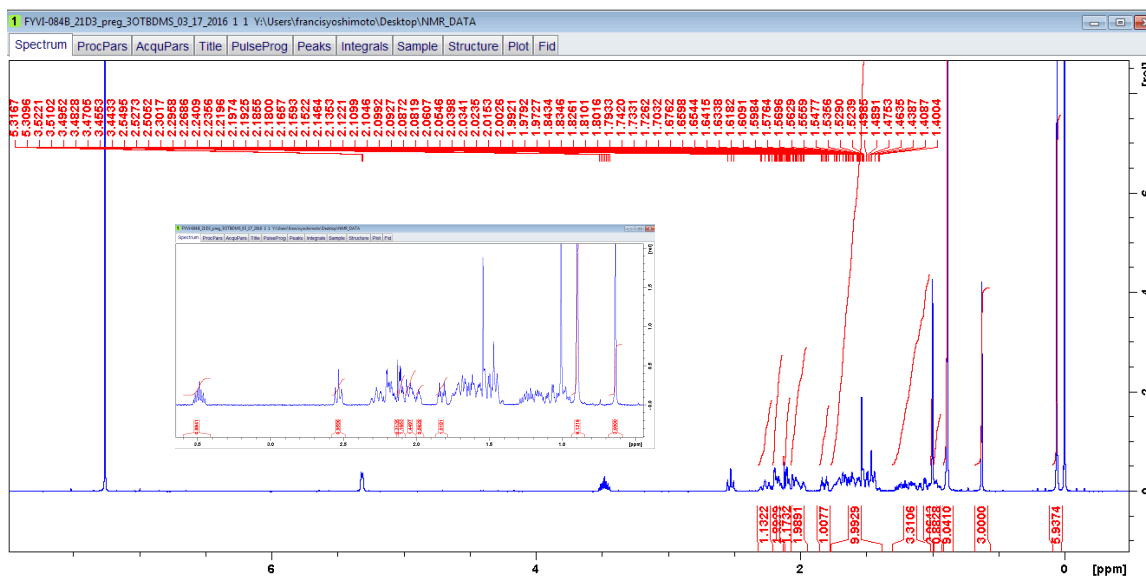

## 6.7. Deuterated dithiane (7a).

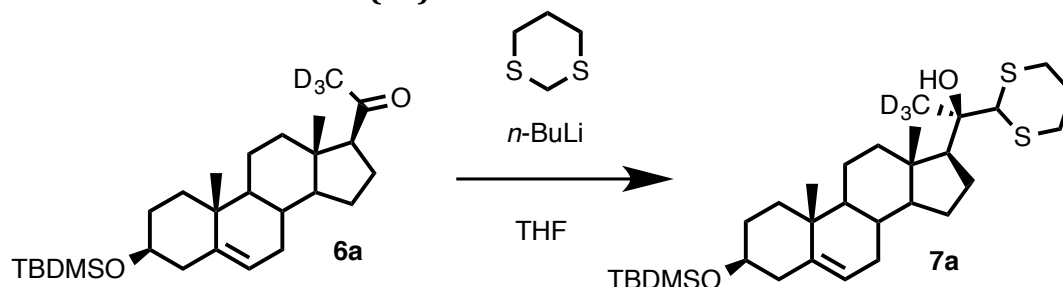

*n*-BuLi (3.68 mL, 2.5 M in diethyl ether, 9.2 mmol, 2.0 mol eq) was added to dithiane (1.11 g, 9.2 mmol, 2.0 mol eq) in THF (50 mL) at -78 °C. The reaction was gradually warmed to -20 °C over 1.5 hr and cooled back to -78 °C. [21,21,21-*d*<sub>3</sub>]-Pregnenolone-3-OTBDMS (**6a**, 2.0 g, 4.6 mmol) in THF (20 mL) was added. After 2.5 h, the reaction was quenched upon addition of H<sub>2</sub>O (100 mL). The reaction mixture was extracted with ethyl acetate (200 mL). The organic extract was concentrated with reduced pressure and

purified by flash column chromatography (100% hexanes to 50% hexanes in ethyl acetate, v/v) to yield dithiane **7a** (0.61 g, 1.1 mmol, 55%). *R<sub>f</sub>* 0.53 of **7a** (hexanes:ethyl acetate, 4:1, v-v). <sup>1</sup>H NMR (600 MHz, CDCl<sub>3</sub>) δ 5.32-5.29 (m, 1H), 4.13 (broad s, 1H), 3.51-3.43 (m, 1H), 2.97-2.92 (m, 1H), 2.90-2.79 (m, 2H), 2.29-2.22 (m, 1H), 2.19-2.12 (m, 1H), 2.12-2.04 (m, 1H), 1.99-1.93 (m, 1H), 1.92-1.76 (m, 3H), 1.75-1.67 (m, 2H), 1.67-1.60 (m, 1H), 1.57-1.38 (m, 5H), 1.25 (td, *J*<sub>1</sub> = 12.9 Hz, *J*<sub>2</sub> = 4.3 Hz, 1H), 1.21-1.12 (m, 1H), 1.06-1.01 (m, 1H), 0.99 (s, 3H), 0.93-0.89 (m, 1H), 0.88 (s, 9H), 0.87 (s, 3H), 0.46 (s, 6H); <sup>13</sup>C NMR (150 MHz, CDCl<sub>3</sub>) δ 141.7, 121.1, 72.7, 61.3, 57.0, 55.2, 50.2, 43.1, 42.9, 40.2, 37.5, 36.7, 32.2, 31.9, 31.7, 31.5, 31.0, 26.14, 26.06, 23.9, 21.8, 21.0, 19.5, 18.4, 13.5, -4.5. Following are the <sup>1</sup>H and <sup>13</sup>C NMR spectra (compound **7a**, CDCl<sub>3</sub>, 600 MHz), followed by DEPT90/ DEPT135/<sup>13</sup>C NMR stacked overlay, HSQC spectra of **7a**.

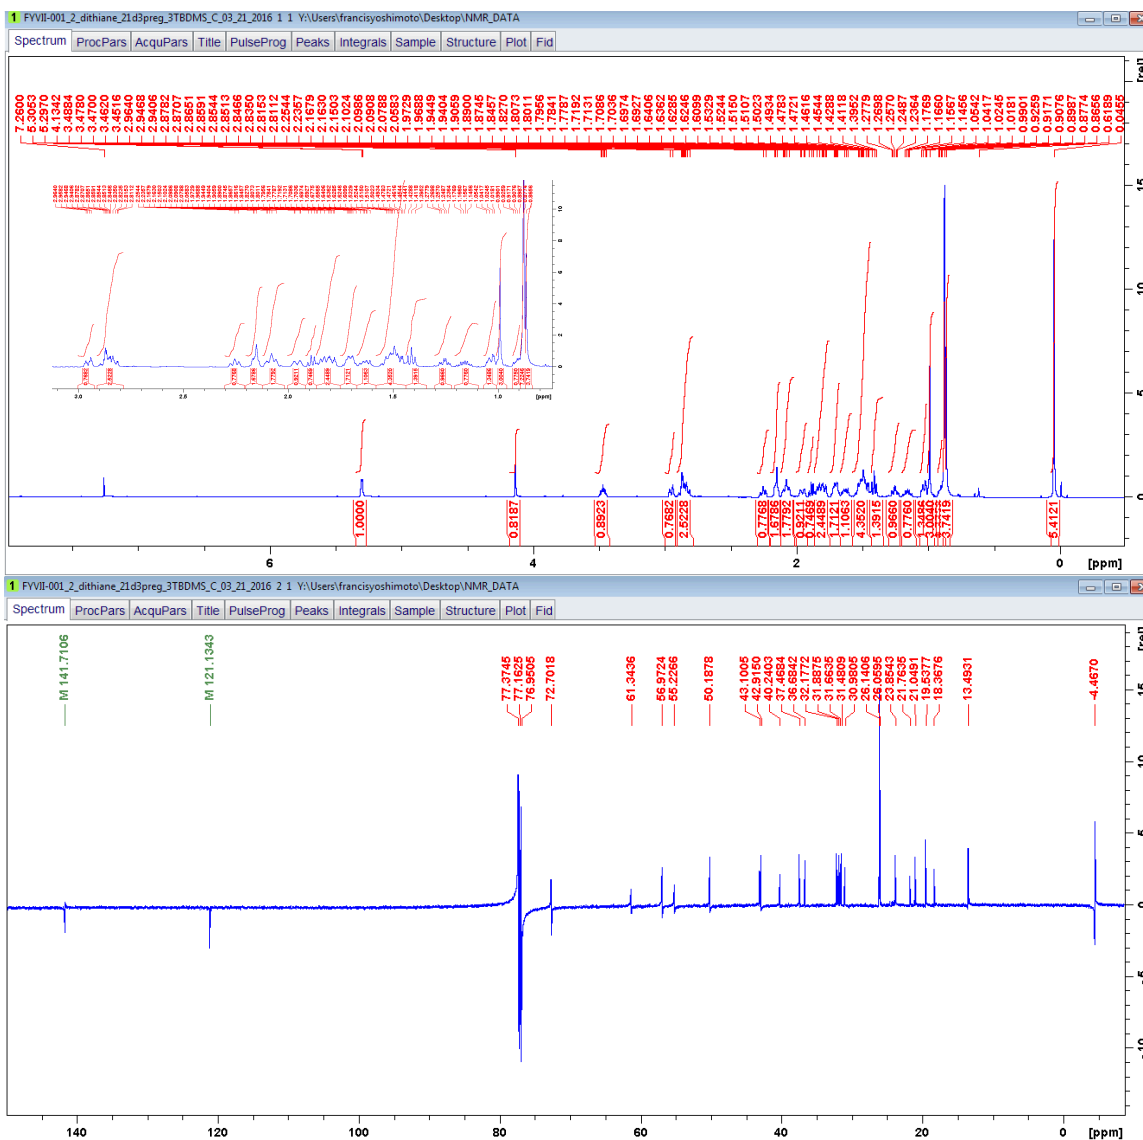



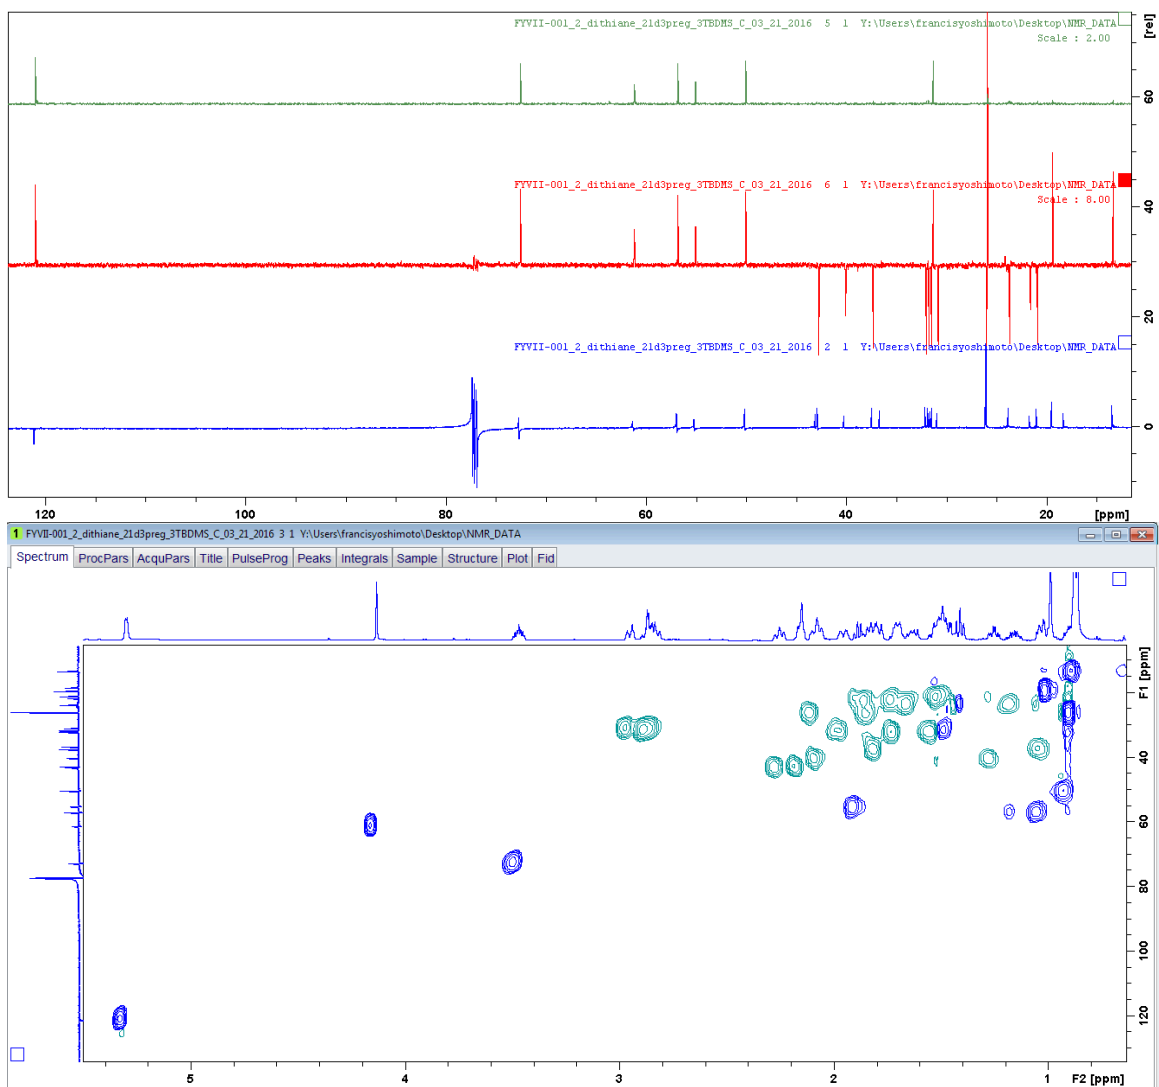

<sup>13</sup>C NMR spectra overlay of compounds **7** and **7a** (non-deuterated vs. deuterated,  $\delta$  - 10 ppm—81 ppm) - notice the absence of the peak at  $\delta$  24.1 ppm in deuterated compound **7a** corresponding to C21:

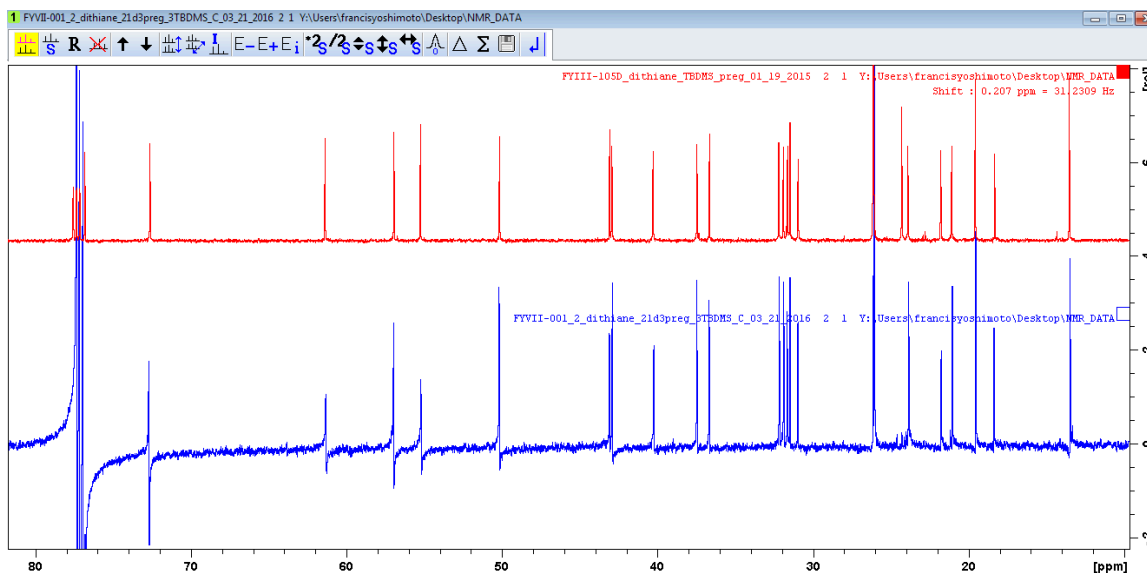

### 6.8. Hg reaction to form deuterated aldehyde (**8a**).

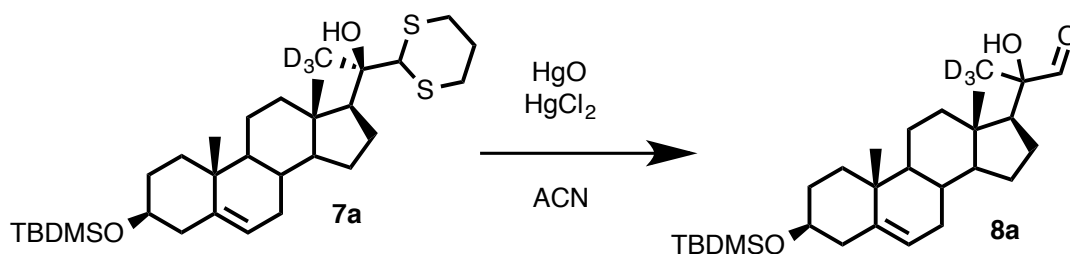

The ratio of acetonitrile to water (100:1 or 10:1, v/v) is important for optimum yield (i.e. excess water lowers the yield of the reaction). Dithiane **7a** (0.61 g, 1.1 mmol), HgO (0.48 g, 2.2 mmol, 2.0 mol eq), HgCl<sub>2</sub> (0.60 g, 2.2 mmol, 2.0 mol eq) were dissolved in acetonitrile (100 mL) and water (100 mL). The reaction was stirred at reflux overnight. The mixture was filtered through a short pad of Celite. The concentrated material was purified by flash column chromatography (100% hexanes to 50% hexanes in ethyl acetate, v/v) to afford aldehyde **8a** (**8a**, 0.08 g, 0.17 mmol, 15%) as a white solid. *R<sub>f</sub>* 0.63 of **8a** (hexanes:ethyl acetate, 4:1, v-v). <sup>1</sup>H NMR (600 MHz, CDCl<sub>3</sub>) δ 9.56 (s, 1H), 5.31-5.30 (m, 1H), 3.51-3.43 (m, 1H), 3.240-3.237 (m, 1H), 2.30-2.24 (m, 1H), 2.19-2.09 (m, 2H), 2.02-1.92 (m, 1H), 1.85-1.76 (m, 1H), 1.76-1.60 (m, 4H), 1.59-1.39 (m, 7H), 1.36-1.24 (m, 3H), 1.22-1.11 (m, 1H), 1.09-1.02 (m, 2H), 1.00 (s, 3H), 0.98-0.90 (m, 1H), 0.89 (s, 12H), 0.79 (s, 3H), 0.05 (s, 6H). Below is the <sup>1</sup>H NMR spectrum (**8a**, CDCl<sub>3</sub>, 600 MHz).

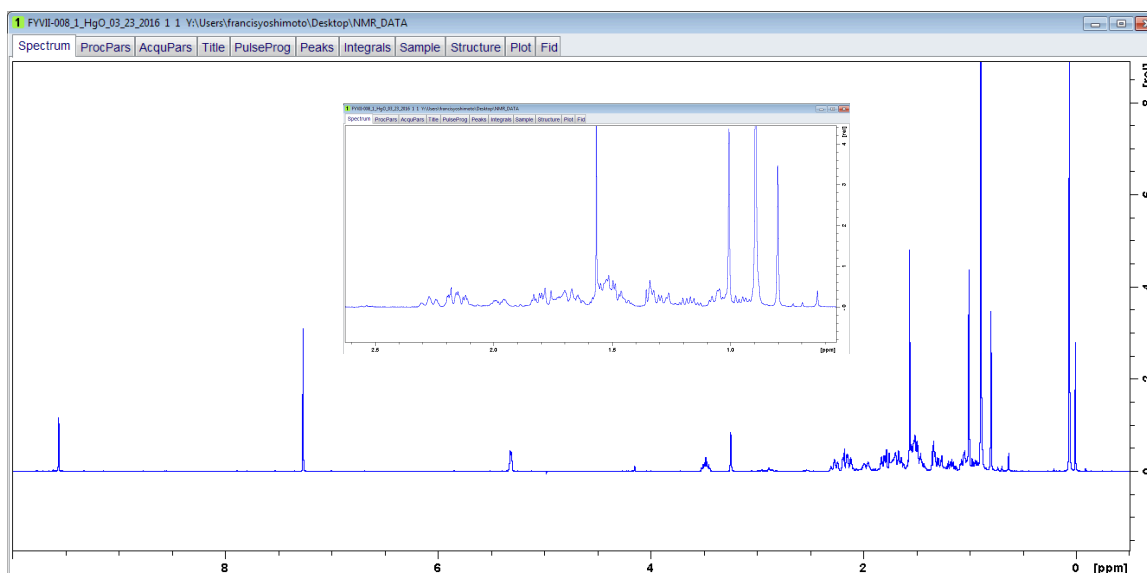

### 6.9. C21-Deuterated Grignard adduct (**9a**).

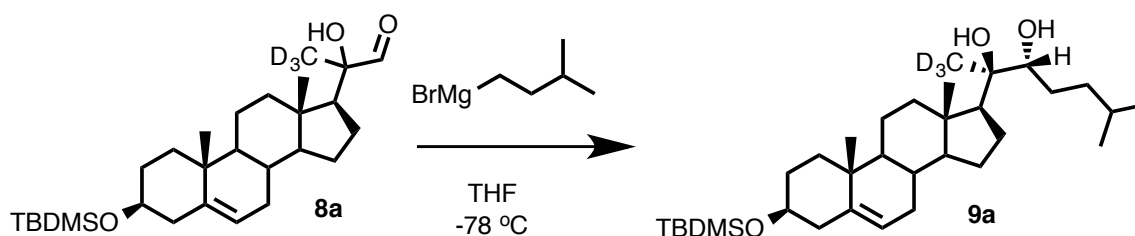

The procedure described in the manuscript to convert aldehyde **8** to diol **9** was followed to convert **8a** to **9a**. \*Diol **9a** was reactive with acetone at room temperature to form the acetonide (see synthesis of **3z**). Therefore, the use of acetone to dissolve diol **9a** was avoided.  $R_f$  0.41 of **9a** (hexanes:ethyl acetate, 4:1, v-v).  $^1\text{H}$  NMR (600 MHz,  $\text{CDCl}_3$ )  $\delta$  5.32-5.31 (m, 1H), 3.51-3.45 (m, 1H), 3.41-3.36 (m, 1H), 2.30-2.23 (m, 1H), 2.21 (d,  $J = 2.7$  Hz, 1H), 2.17 (ddd,  $J_1 = 13.4$  Hz,  $J_2 = 4.7$  Hz,  $J_3 = 2.2$  Hz, 1H), 2.14-2.09 (m, 1H), 2.01-1.94 (m, 1H), 1.85-1.77 (m, 3H), 1.75-1.69 (m, 1H), 1.69-1.59 (m, 2H), 1.59-1.39 (m, 11H), 1.32-1.09 (m, 7H), 1.08-1.02 (m, 1H), 1.00 (s, 3H), 0.91 (d,  $J = 6.9$  Hz, 1H), 0.89 (broad s, 13H), 0.88-0.84 (m, 1H), 0.56 (s, 6H);  $^{13}\text{C}$  NMR (150 MHz,  $\text{CDCl}_3$ )  $\delta$  141.8, 121.2, 72.7, 56.9, 54.9, 50.3, 43.4, 43.0, 40.4, 37.5, 36.8, 36.5, 32.2, 32.0, 31.5, 29.3, 28.3, 26.1, 24.1, 23.1, 22.5, 22.1, 21.1, 19.6, 18.4, 13.7, 0.15, -4.4. Below are the  $^1\text{H}$  and  $^{13}\text{C}$  NMR spectra (**9a**,  $\text{CDCl}_3$ , 600 and 150 MHz), HSQC, NOESY, and COSY spectra.

1 FVII-033\_Grignard\_CD3\_tube10\_04\_06\_2016 1 1 Y:\Users\francis Yoshimoto\Desktop\NMR\_DATA  
Spectrum ProcPars AcqPars Title PulseProg Peaks Integrals Sample Structure Plot Fid

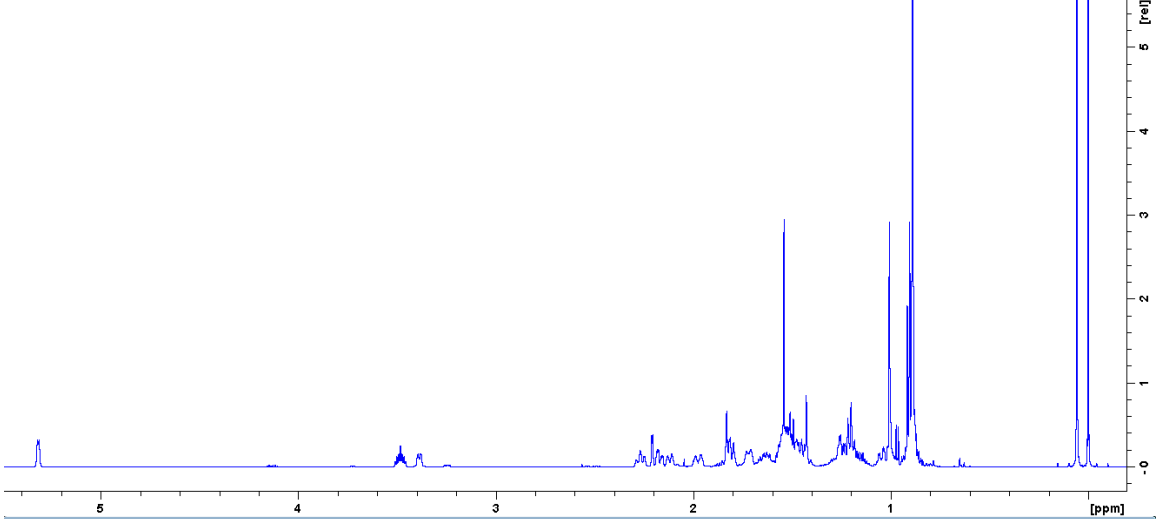

1 FVII-033\_Grignard\_CD3\_tube10\_04\_06\_2016 2 1 Y:\Users\francis Yoshimoto\Desktop\NMR\_DATA  
Spectrum ProcPars AcqPars Title PulseProg Peaks Integrals Sample Structure Plot Fid

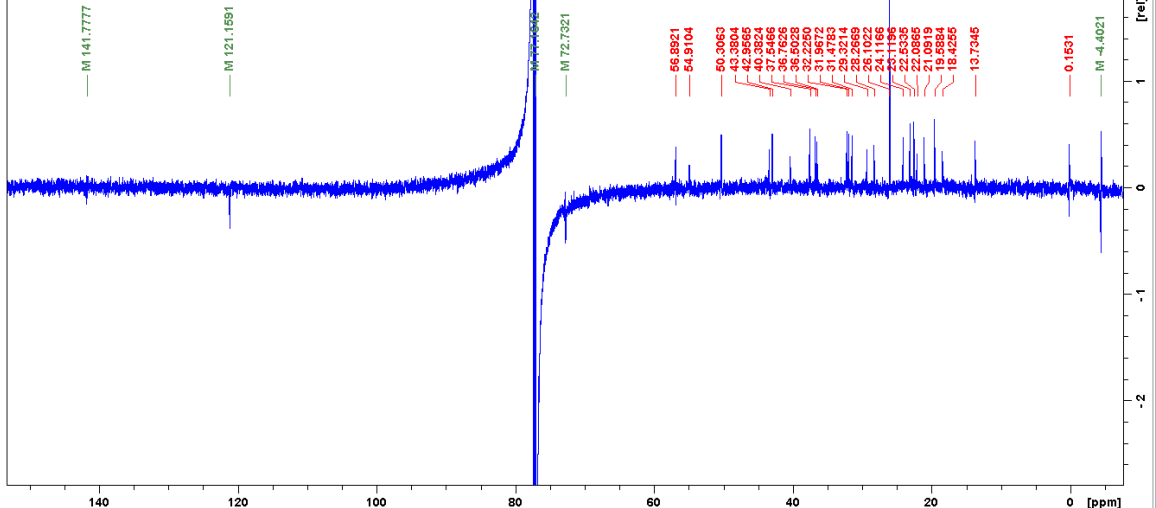

1 FVII-033\_Grignard\_CD3\_tube10\_04\_06\_2016 3 1 Y:\Users\francis Yoshimoto\Desktop\NMR\_DATA  
Spectrum ProcPars AcqPars Title PulseProg Peaks Integrals Sample Structure Plot Fid

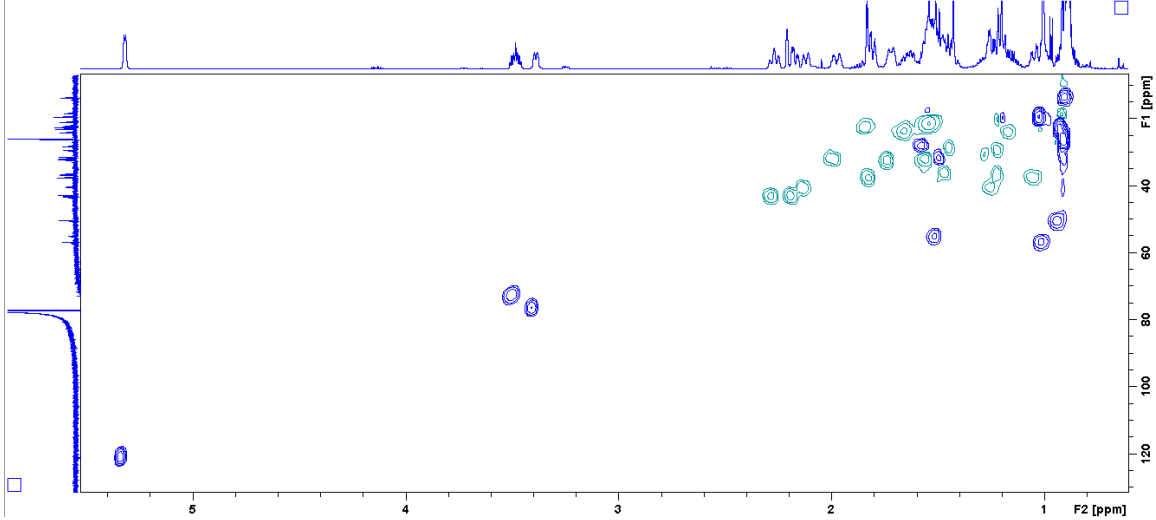

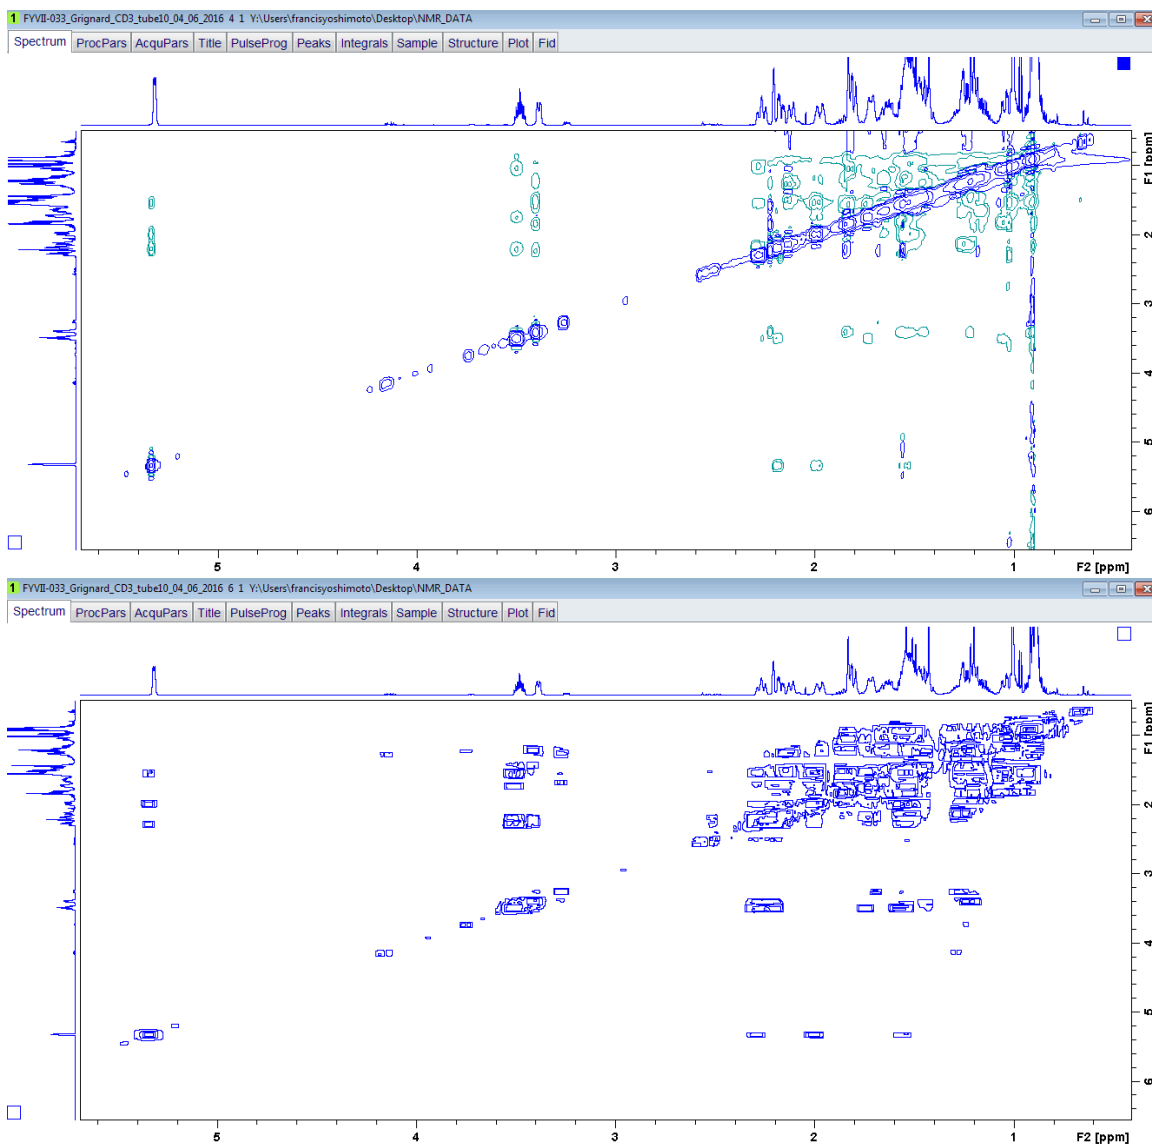

### 6.10. Synthesis of 21,21,21- $d_3$ -3 $\beta$ ,20 $R$ ,22 $R$ -triol (**3a**).

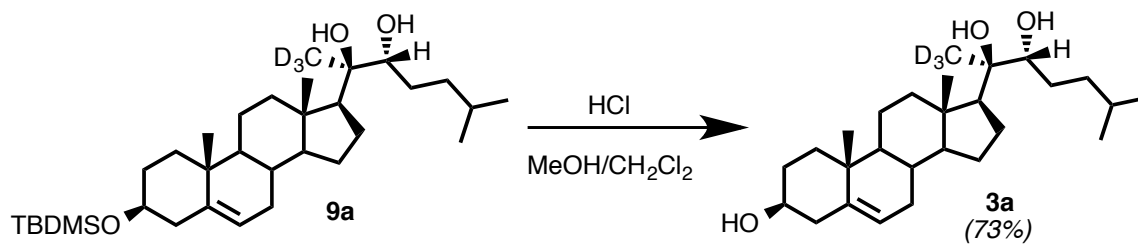

Beginning with **9a** (7 mg, 13  $\mu$ mol) and following the procedure in the main text for **9** to **3**, the triol **3a** was obtained (4 mg, 9.5  $\mu$ mol, 73%). Similar to diol **9a**, triol **3a** is reactive with acetone to form the 20,22-acetonide, so the use of acetone was avoided to dissolve

triol **3a**. Ethyl acetate, hexanes, methanol, and dichloromethane were solvents used with compounds **9a** and **3a**. The  $R_f$  of **3a** 0.59 (hexanes:ethyl acetate, 1:1, v-v).  $^1\text{H}$  NMR (600 MHz,  $\text{CDCl}_3$ )  $\delta$  5.38-5.33 (m, 1H), 3.58-3.48 (m, 1H), 3.41-3.36 (m, 1H), 2.35-2.18 (m, 1H), 2.16-2.06 (m, 1H), 2.04-1.94 (m, 1H), 1.89-1.78 (m, 3H), 1.76-1.39 (m, 10H), 1.30-1.12 (m, 6H), 1.12-1.03 (m, 1H), 1.02 (s, 3H), group of singlets with 9H integration: (0.916, 0.904, 0.900, 0.893, 0.888);  $^{13}\text{C}$  NMR (150 MHz,  $\text{CDCl}_3$ )  $\delta$  140.9, 121.7, 76.6, 71.9, 56.8, 50.2, 43.4, 42.4, 43.3, 36.7, 36.5, 31.9, 31.8, 31.4, 29.3, 28.2, 24.1, 23.1, 22.5, 21.1, 19.5, 13.7. Below are the  $^1\text{H}$  and  $^{13}\text{C}$  NMR spectra (**3a**,  $\text{CDCl}_3$ , 600 and 150 MHz).

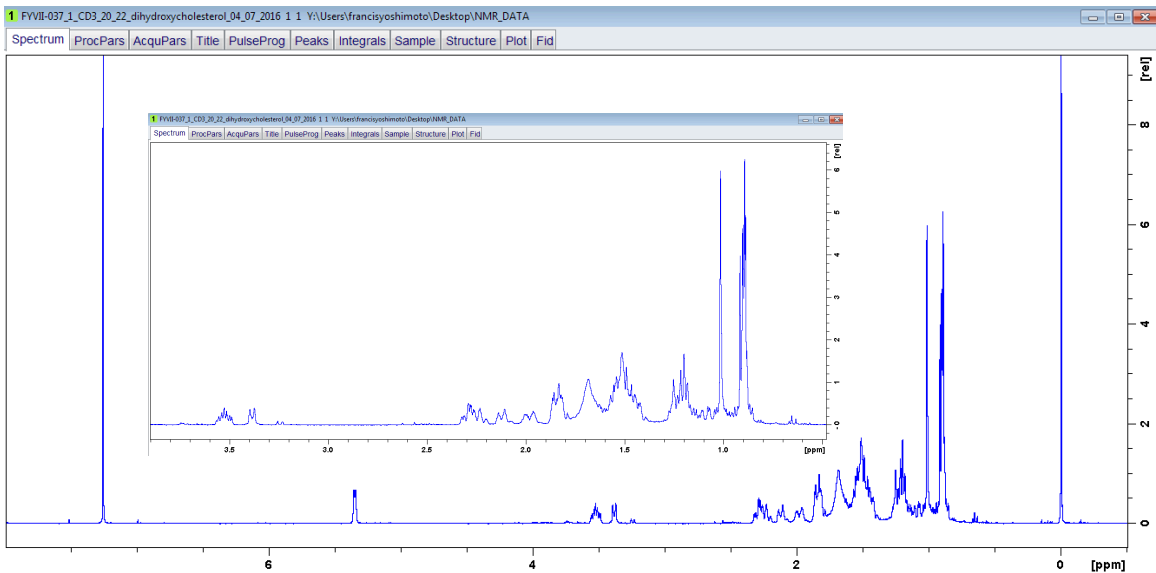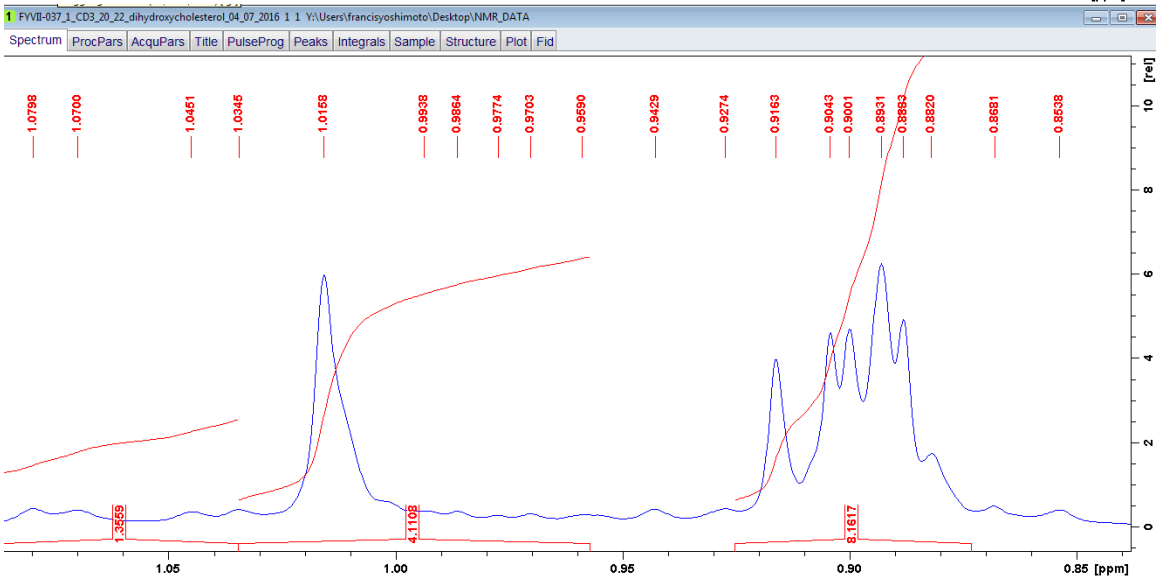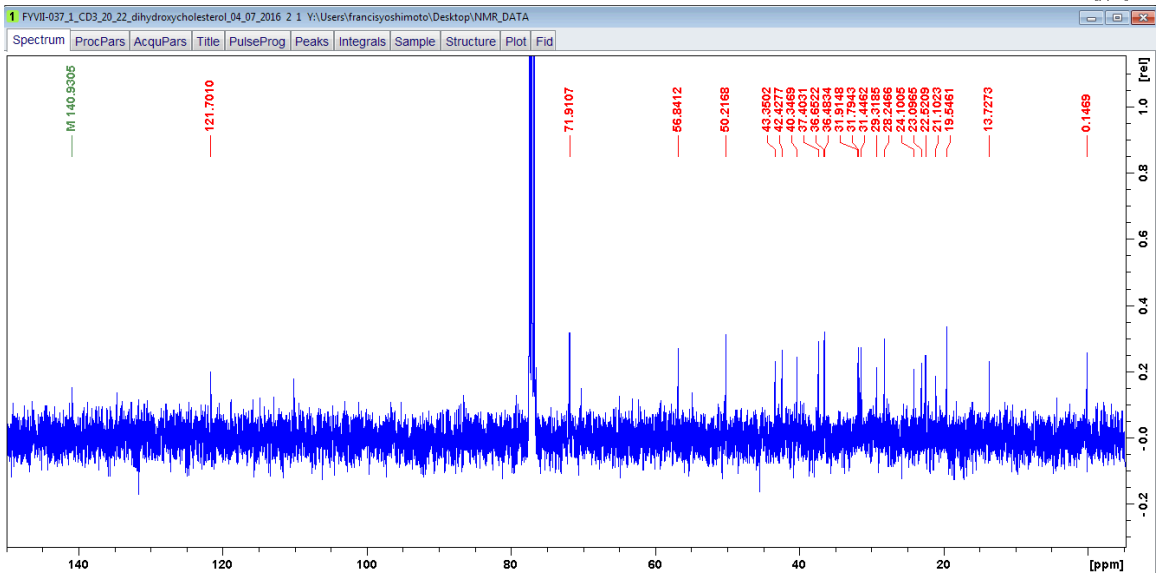

Overlay of 20R,22R-dihydroxycholesterol (**3**) and 21,21,21-*d*<sub>3</sub>-20R,22R-dihydroxycholesterol (**3a**) in the upfield region:

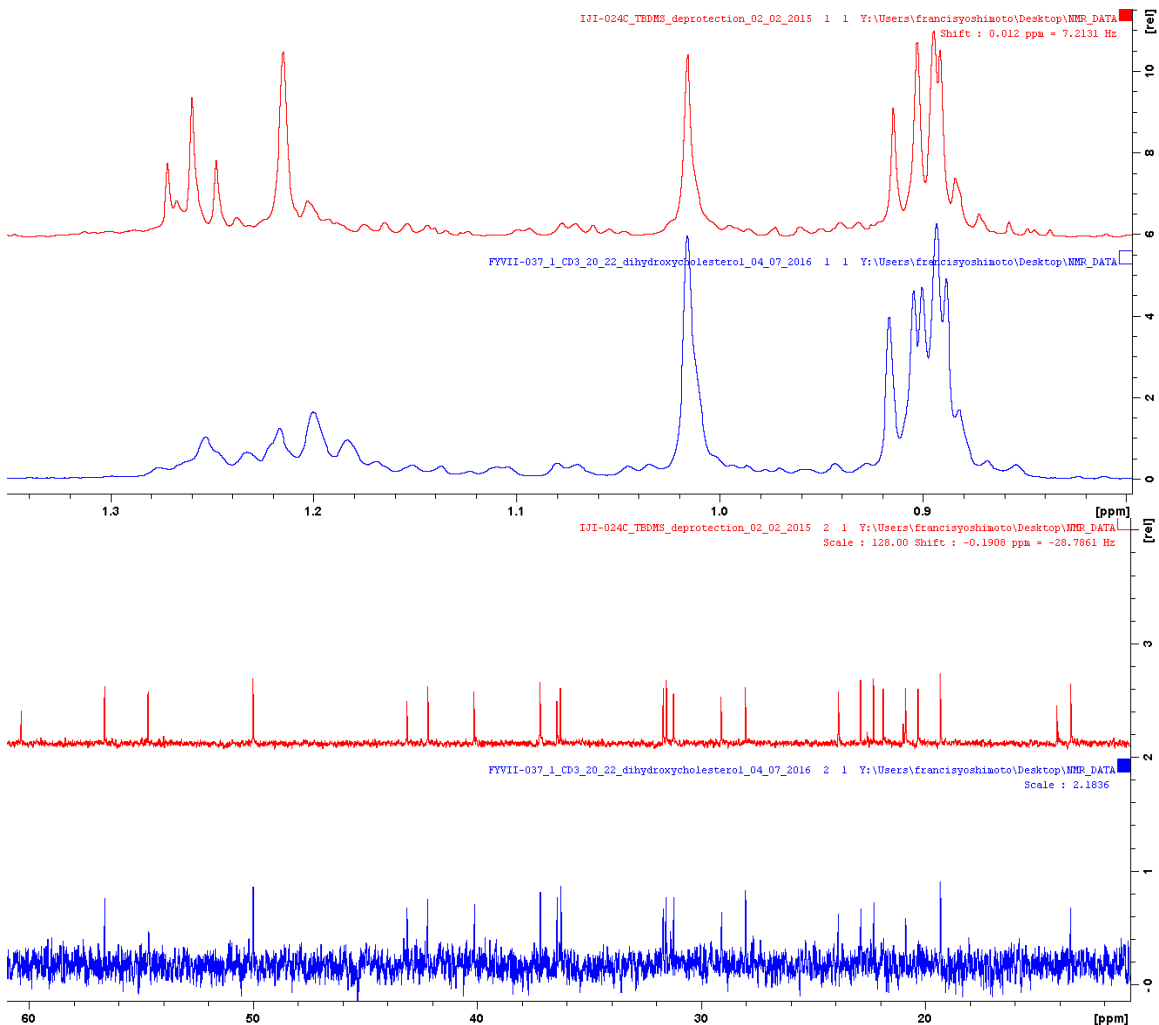

### 6.11. Acetonide (**3z**) formation with exposure to acetone from compound **9a**.

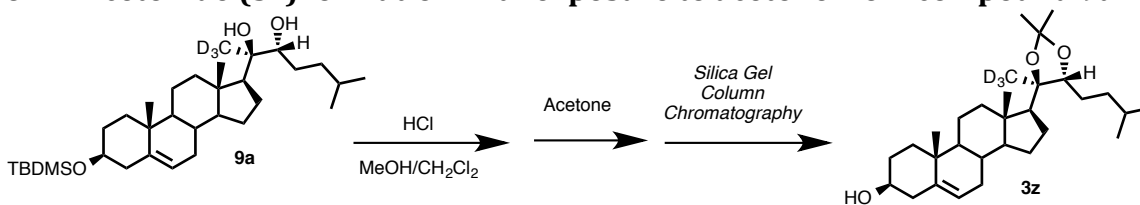

The TBDMS-deprotection procedure to yield triol **3a** was performed, however, before purification by flash column chromatography, acetone was used to dissolve the triol (**3a**) residue to load the material on the silica gel column. The only recovered material was the acetonide (**3z**). <sup>1</sup>H NMR of **3z** (600 MHz, CDCl<sub>3</sub>) δ 5.37-5.33 (m, 1H), 3.63 (dd, *J*<sub>1</sub> = 9.4 Hz, *J*<sub>2</sub> = 2.6 Hz, 1H), 3.57-3.48 (m, 1H), 2.33-2.27 (m, 1H), 2.27-2.19 (m, 1H), 2.16-2.11 (m, 1H), 2.12-2.05 (m, 1H), 2.02-1.95 (m, 1H), 1.95-1.79 (m, 3H), 1.69-1.42 (m, 13H), 1.41 (s, 3H), 1.39-1.30 (m, 2H), 1.30 (s, 3H), 1.20-1.03 (m, 5H), 1.01 (s, 3H), 0.95-0.91 (m, 1H), 0.90 (s, 3H), 0.89 (s, 3H), 0.81 (s,



3H);  $^{13}\text{C}$  NMR (150 MHz,  $\text{CDCl}_3$ )  $\delta$  121.8, 106.7, 57.1, 50.2, 42.4, 40.2, 37.4, 36.6, 31.9, 31.8, 31.7, 31.1, 29.2, 28.4, 27.0, 26.9, 24.1, 22.9, 22.70, 22.66, 21.2, 19.6, 13.1, 0.13. Attempts to convert the acetonide back to the triol (compound **3a**) with HCl (0.5 mL, 12 M) in  $\text{CH}_3\text{OH}$  (5 mL) at room temperature for 24 h resulted in major decomposition to an unwanted compound. Following are the  $^1\text{H}$ ,  $^{13}\text{C}$  NMR, and HSQC spectra (**3z**,  $\text{CDCl}_3$ , 600 and 150 MHz).

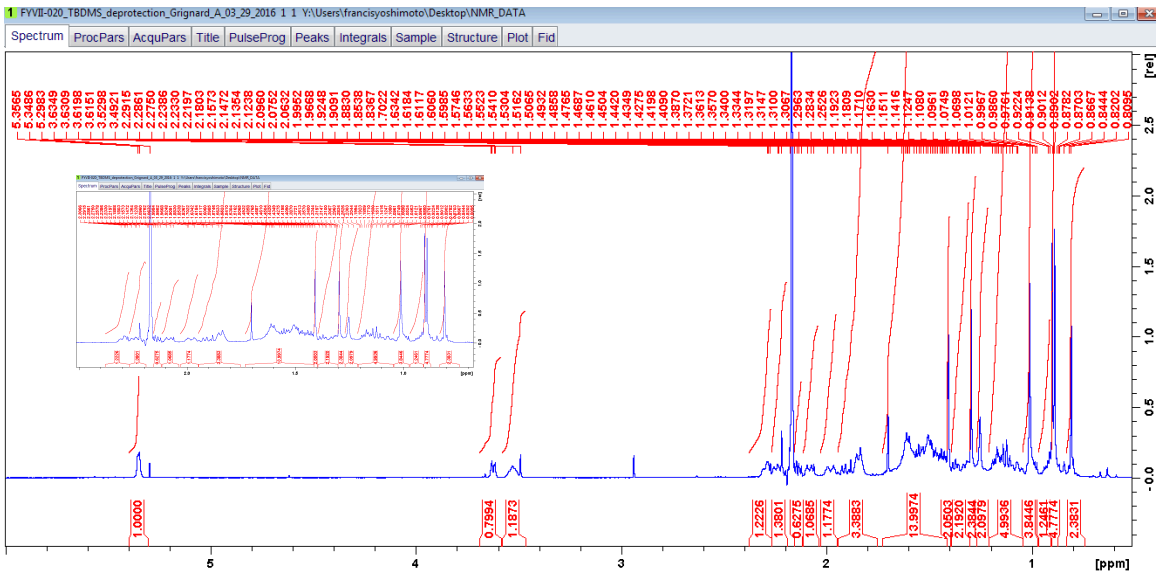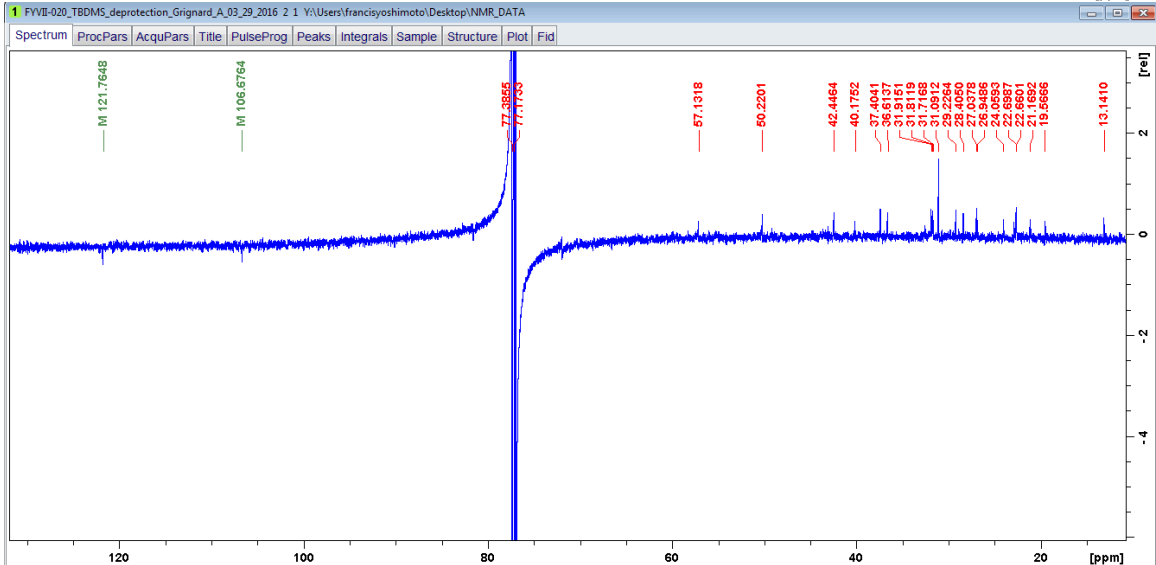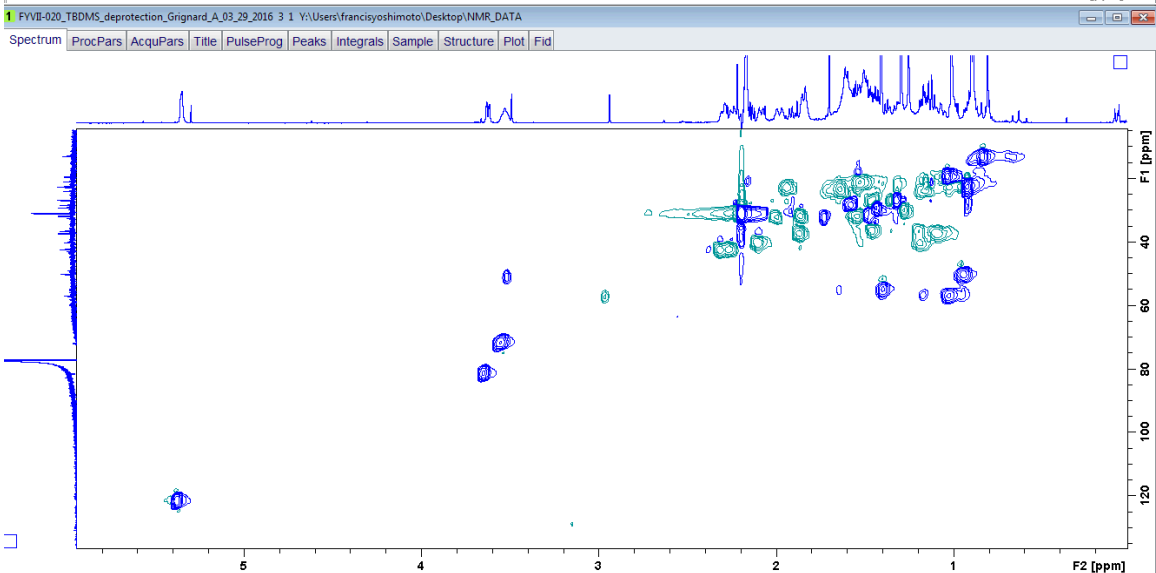

## 6.12. Synthesis of isocaproaldehyde (5) (see main text for procedure).

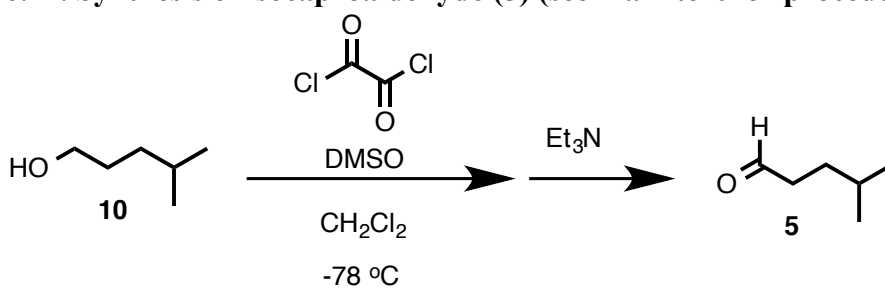

Following are the <sup>1</sup>H and <sup>13</sup>C NMR spectra (5, CDCl<sub>3</sub>, 600 and 150 MHz).

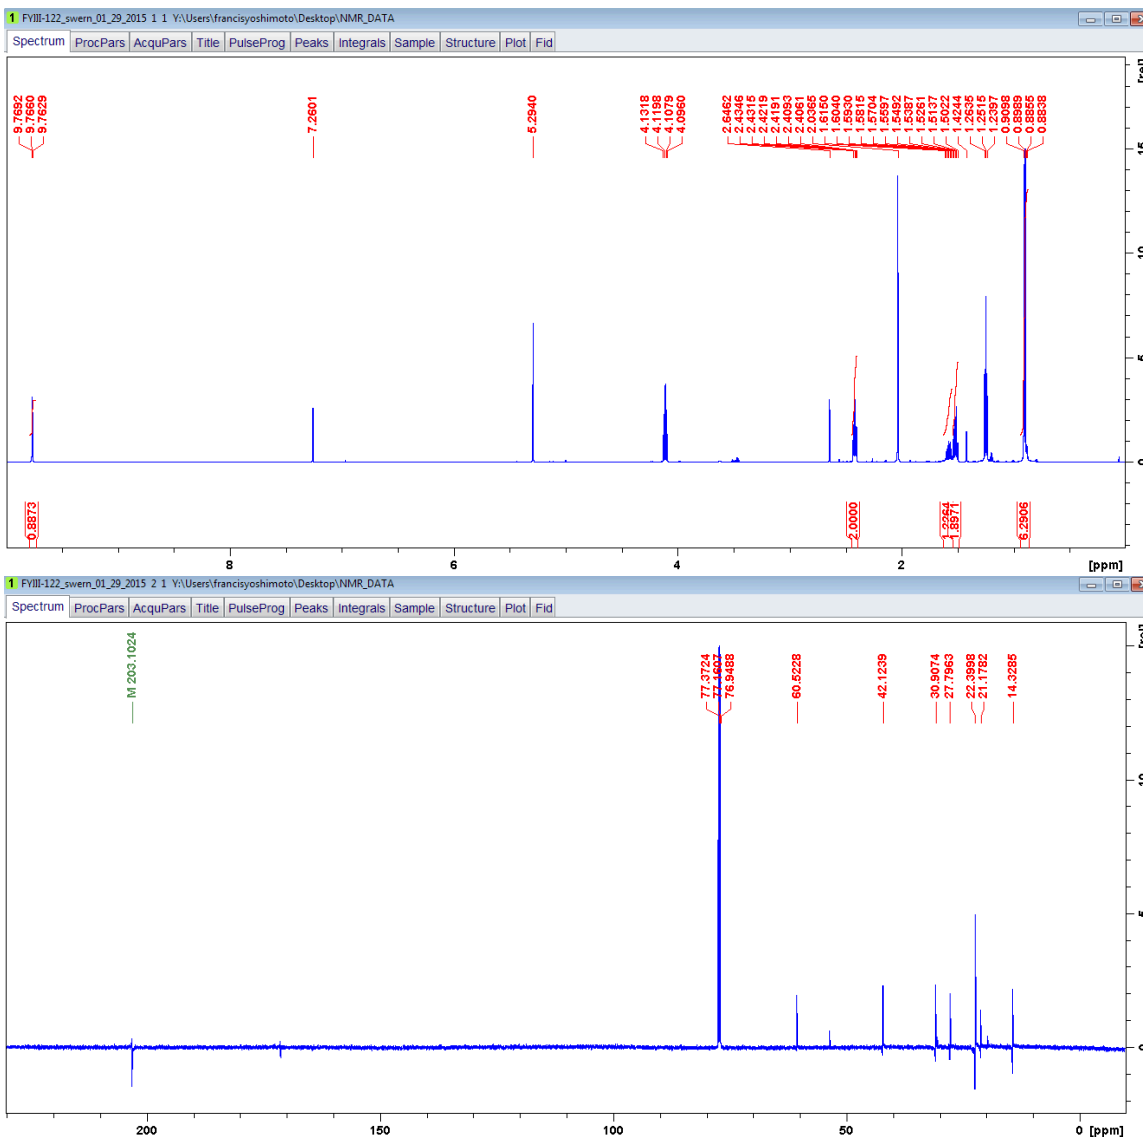

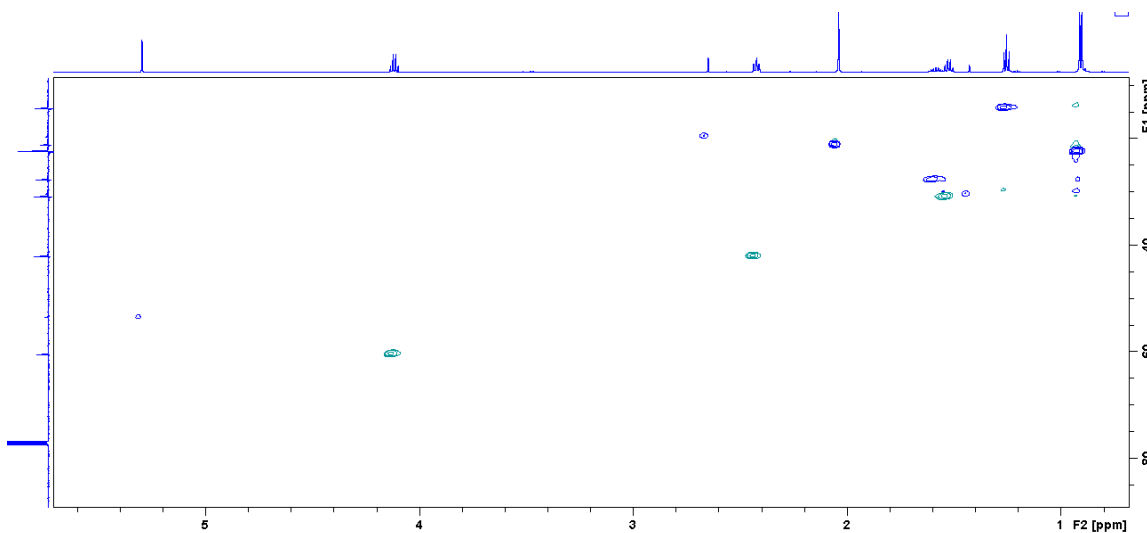

**$^1\text{H}$  NMR spectrum of isocaproaldehyde (**5**) in  $\text{D}_2\text{O}$  (potassium phosphate buffer,  $\text{pD} = 7.4$ , as described in the manuscript).**

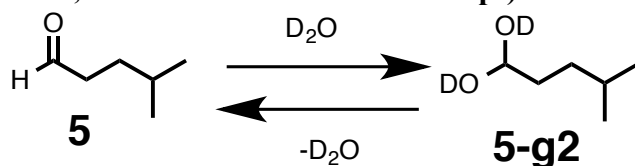

The integrations of the aldehyde and *gem*-dihydroxymethine (**5** and **5-g2**) can be calculated to determine the ratio of the aldehyde and *gem*-diol (1.0:0.9) in  $\text{D}_2\text{O}$  (600 MHz). Similarly, the methyl protons (C5,  $\delta$  0.88, 0.89) can also be used to determine the same ratio. Below is the  $^1\text{H}$  NMR spectrum (**5**,  $\text{D}_2\text{O}$ , 600 MHz) along with the expanded regions ( $\delta$  0.80-2.65 ppm and  $\delta$  4.75-5.10 ppm).

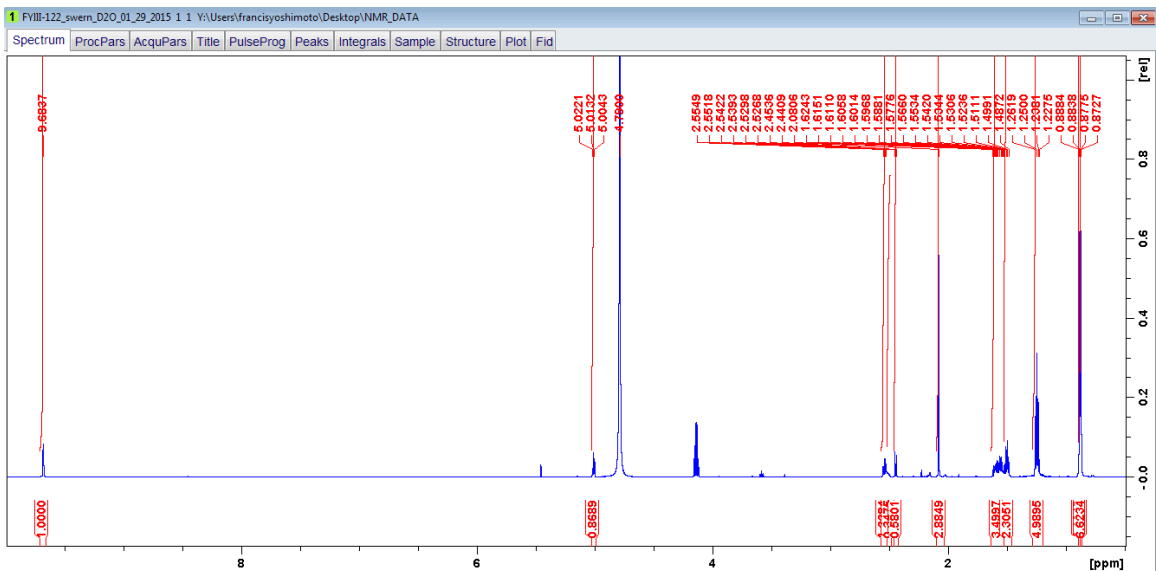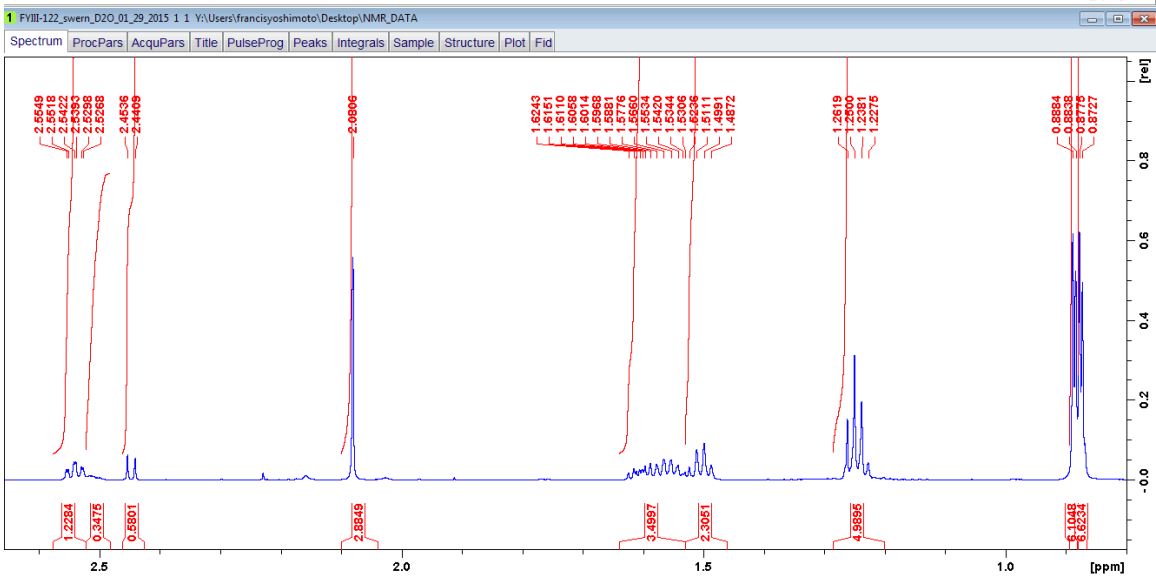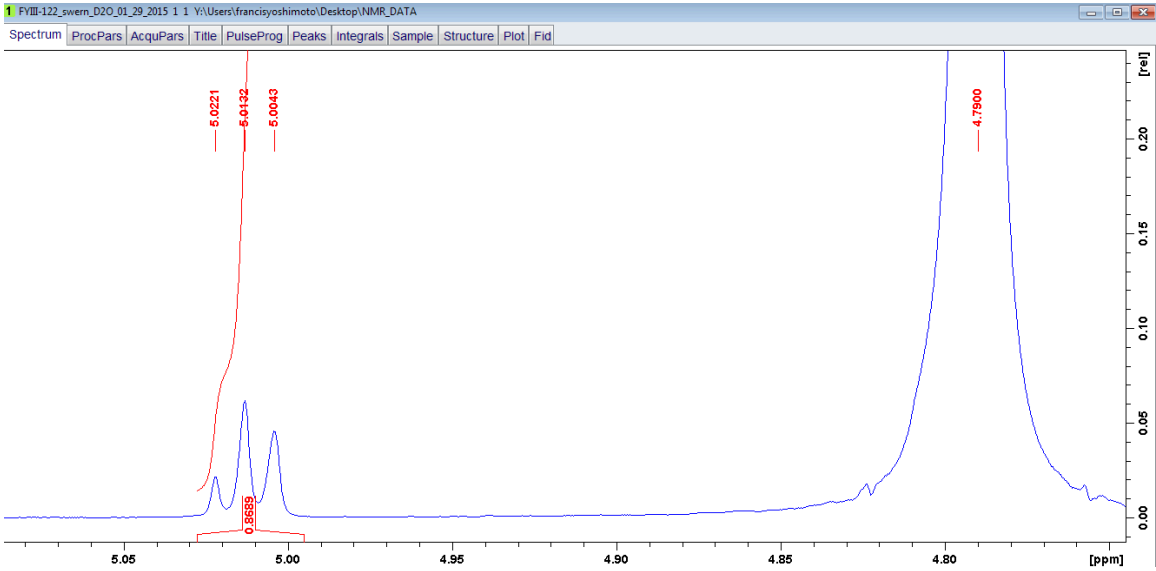

### 6.13. Synthesis of 4-methyl-pentan-1-ol picolinoyl ester (**15**).

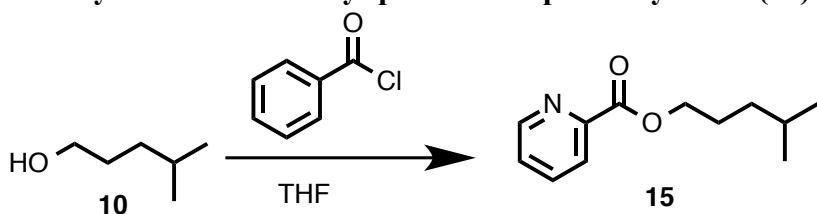

Picolinoyl chloride (200 mg, 1.4 mmol) was added to a solution of 4-methyl-pentan-1-ol (100 mg, 0.98 mmol) in THF (10 mL). The reaction was stirred at room temperature for 2 hr and concentrated by reduced pressure. The crude material was purified by preparative TLC (2,000  $\mu$ M thickness of silica, 1:1 ethyl acetate:hexanes, v/v) to afford picolinoyl ester **15** as an oil (20 mg, 0.10 mmol, 10%).  $R_f$  0.5 of compound **15** (hexanes:ethyl acetate, 1:1, v-v).  $^1\text{H}$  NMR (600 MHz,  $\text{CDCl}_3$ )  $\delta$  8.73 (d,  $J = 4.9$  Hz, 1H), 8.09 (d,  $J = 7.7$  Hz, 1H), 7.81 (td,  $J_1 = 7.7$  Hz,  $J_2 = 1.6$  Hz, 1H), 7.44 (ddd  $J_1 = 7.7$  Hz,  $J_2 = 4.6$  Hz,  $J_3 = 0.9$  Hz, 1H), 4.36 (t,  $J = 7.1$  Hz, 1H), 1.82-1.77 (m, 2H), 1.61-1.49 (m, 2H), 1.31-1.25 (m, 2H), 0.87 (d,  $J = 6.5$  Hz, 6H);  $^{13}\text{C}$  NMR (150 MHz,  $\text{CDCl}_3$ )  $\delta$  165.3, 150.0, 148.4, 137.1, 126.9, 125.2, 66.4, 35.0, 29.3, 27.8, 26.7, 22.5. Following are the  $^1\text{H}$  and  $^{13}\text{C}$  NMR spectra (**15**,  $\text{CDCl}_3$ , 600 and 150 MHz).

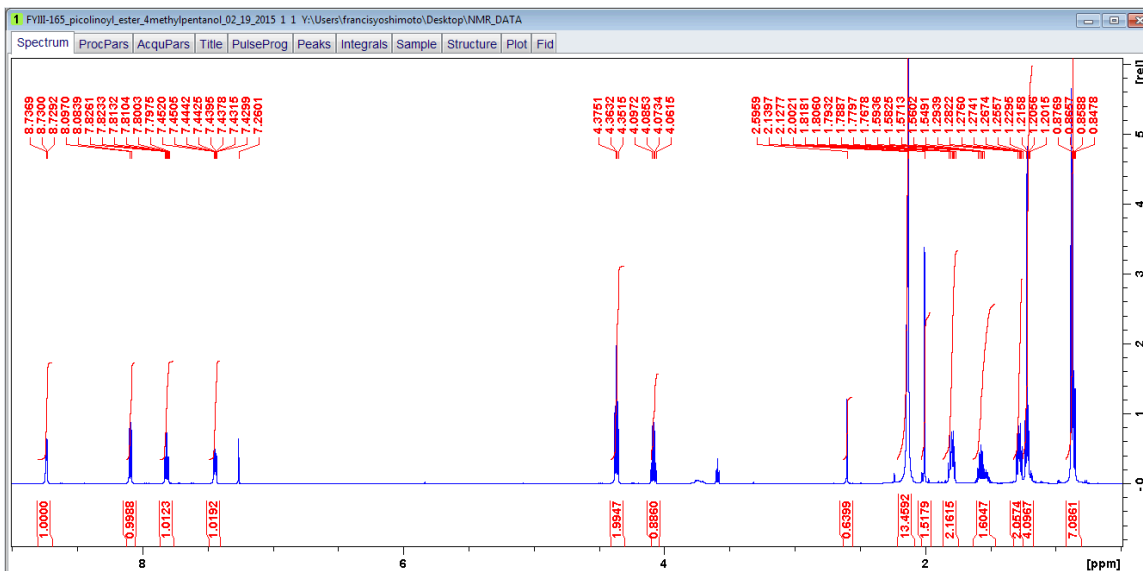

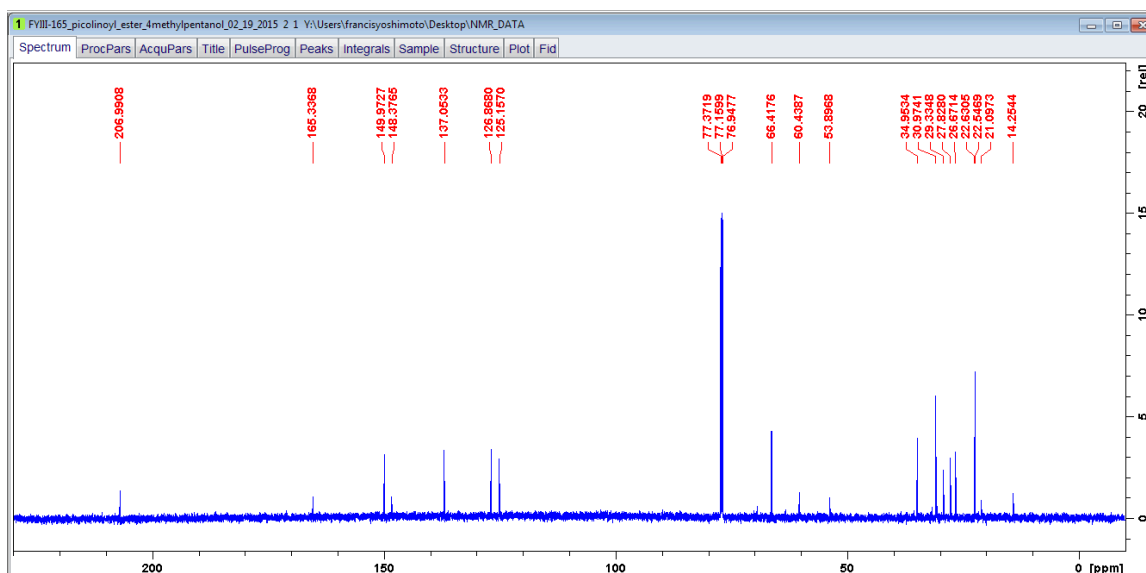

**6.14. 4-Step Synthesis of 3b.** The following reaction sequence was followed to access 17,21,21,21-d<sub>4</sub>-20*R*,22*R*-dihydroxycholesterol (**3b**).

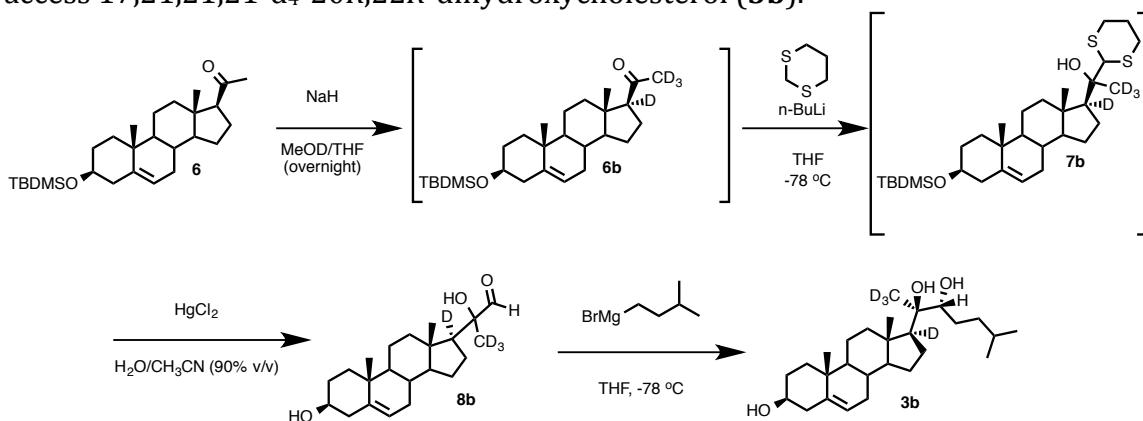

#### 6.14.1. Synthesis of 17,21,21,21-d<sub>4</sub>-pregnenolone-3-*O*-*tert*-butyldimethylsilyl ether (**6b**).

NaH (3.0 g, 125 mmol) was added to a solution of pregnenolone-3-*O*-*tert*-butyldimethylsilyl ether **6** (5.5 g, 12.8 mmol) in THF (100 mL) and D<sub>2</sub>O (20 mL) at 0 °C. The flask was evacuated and backfilled with argon. MeOD (5 mL, 99%) was added and the reaction was stirred overnight. The reaction mixture was concentrated, and the crude material (17,21,21,21-d<sub>4</sub>-pregnenolone-3-*O*-*tert*-butyldimethylsilyl ether, **6b**) was directly used for the next step (compound **6b** to compound **7b**). Following is the <sup>1</sup>H NMR spectrum of the crude material (**6b**, CDCl<sub>3</sub>, 600 MHz).

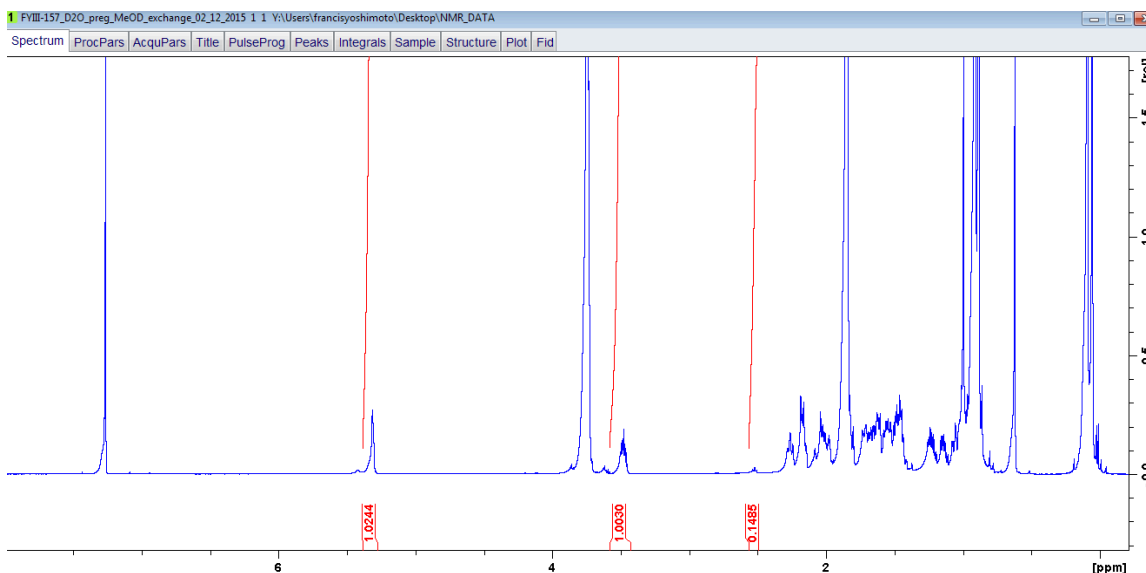

#### 6.14.2. Synthesis of 17,21,21,21-*d*<sub>4</sub>-dithiane (**7b**).

*n*-BuLi (14.7 mL, 2.5 M, 37 mmol) was added to a solution of 1,3-dithiane (4.8 g, 40 mmol) in THF (100 mL) at -78 °C. After 1 h, **6b** (crude material from the previous step) was added in THF (50 mL) and was stirred for 1.5 h during which the reaction was warmed gradually to -20 °C. The reaction was quenched with H<sub>2</sub>O (100 mL). The reaction mixture was extracted with ethyl acetate (250 mL) and concentrated under reduced pressure. The crude material (~2.3 g) was used directly for the next reaction.

#### 6.14.3. Synthesis of 3-hydroxy-aldehyde (**8b**).

A mixture of HgO (1.3 g, 6.2 mmol, 1.5 mol eq), HgCl<sub>2</sub> (2.2 g, 8.2 mmol, 2.0 mol eq), and dithiane (2.3 g, 4.1 mmol) in acetonitrile:H<sub>2</sub>O (150 mL:10 mL) was refluxed for 2.5 hr. The reaction mixture was filtered through a short pad of silica gel with ethyl acetate (100 mL) to remove the mercury salts. The eluent was concentrated under reduced pressure and purified by flash column chromatography (100% hexanes to 50% hexanes/ethyl acetate, v/v) to afford 3-hydroxy-aldehyde (**8b**, 1.9 g, 5.4 mmol, 42% for three steps from **6b**) as a white solid. Below is the <sup>1</sup>H NMR spectrum of



compound **8b** ( $\text{CDCl}_3$ , 400 MHz).

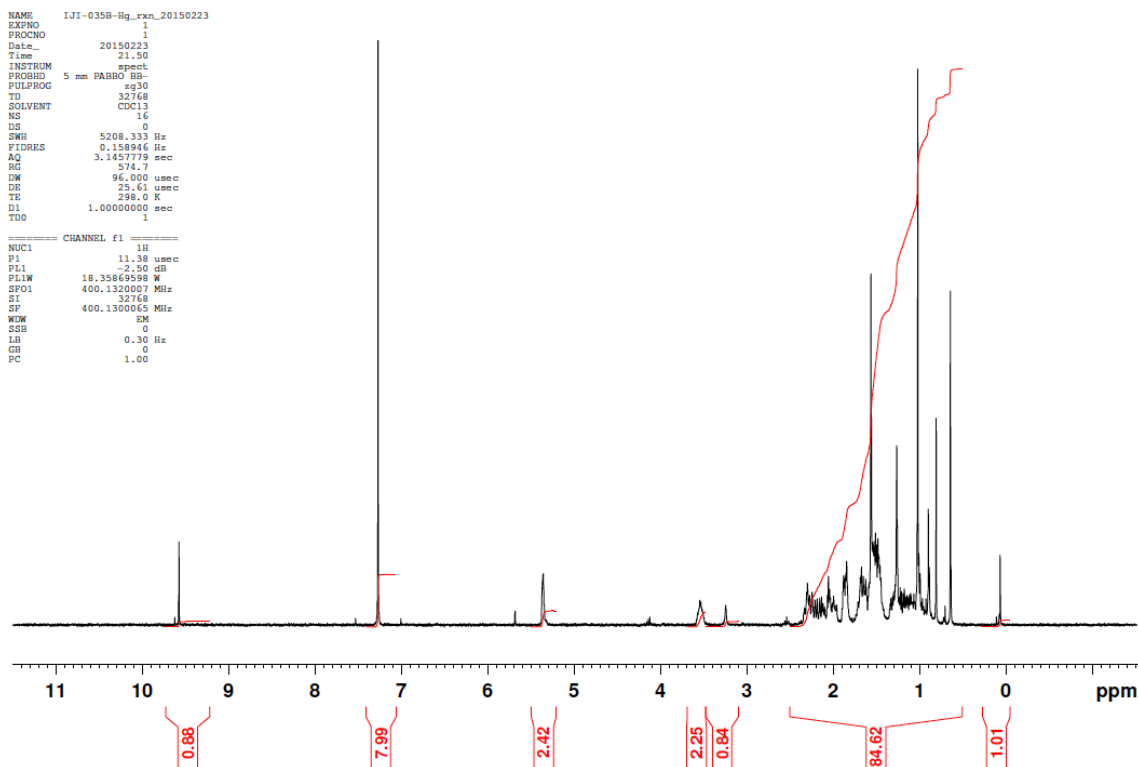

#### 6.14.4. Synthesis of 17,21,21,21- $d_4$ -20R,22R-dihydroxycholesterol (**3b**).

Isopentylmagnesium bromide (32 mL of a 2.5 M solution in diethyl ether, 82 mmol) was added to 3-hydroxyaldehyde (1.9 g, 4.09 mmol) in THF (150 mL) at  $-78^\circ\text{C}$ . After 2 hr, the reaction was quenched with  $\text{H}_2\text{O}$  (100 mL) at  $-78^\circ\text{C}$  and warmed to room temperature. The reaction mixture was extracted with ethyl acetate ( $2 \times 150$  mL). The combined organic extracts were concentrated with reduced pressure and purified by flash column chromatography (100% hexanes to 50% hexanes and ethyl acetate v/v) to afford title compound (500 mg, 1.18 mmol, 29%) as an impure mixture but contained the desired product (**3b**) from an LC-MS analysis (calculated  $[\text{M}-\text{H}_2\text{O}]^+$ :  $m/z$  405.3665, found:  $m/z$  405.3657,  $\Delta = 1.9$  ppm, APCI-positive). This mixture was directly used for the incubation with P450 11A1.

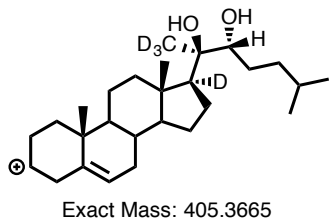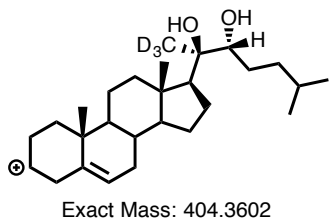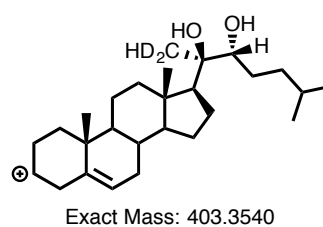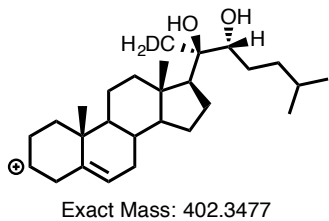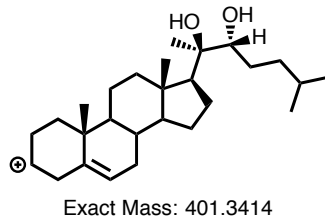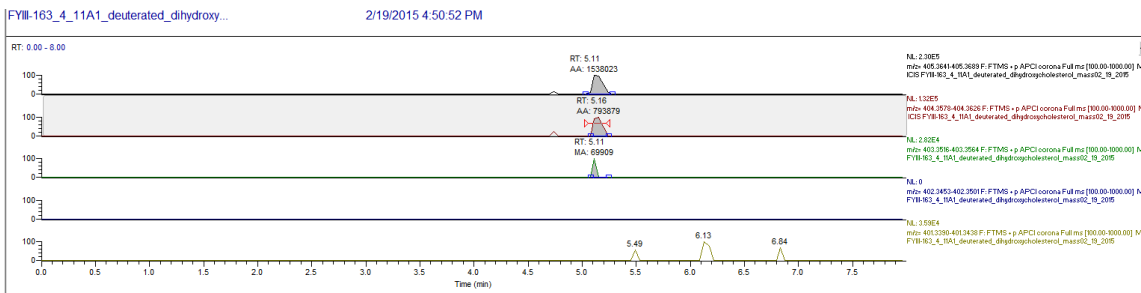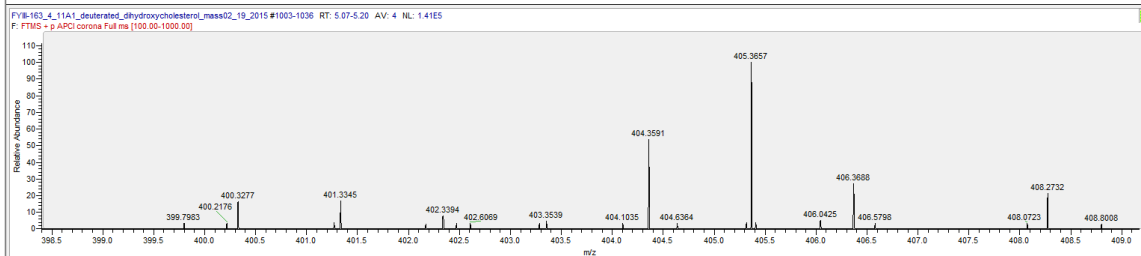

Supplement: NIHMS846314-supplement-Supplemental.pdf [file NIHMS846314-supplement-Supplemental.pdf]
